# Supplementary material for: Systematic comparison of variant calling pipelines using gold standard personal exome variants
Source: PubMed Central journal article supplement (PMC4671096; doi:10.1038/srep17875), 2015-12-07
Supplement: srep17875-s1.pdf [file srep17875-s1.pdf]

## **Supplementary Online Information**

### **Systematic comparison of variant calling pipelines using gold standard personal exome variants**

Sohyun Hwang, Eiru Kim, Insuk Lee and Edward M Marcotte

# Supplementary Figure 1. Precision-Recall curves for calling SNPs and indels from twelve NA12878 samples using thirteen pipelines.

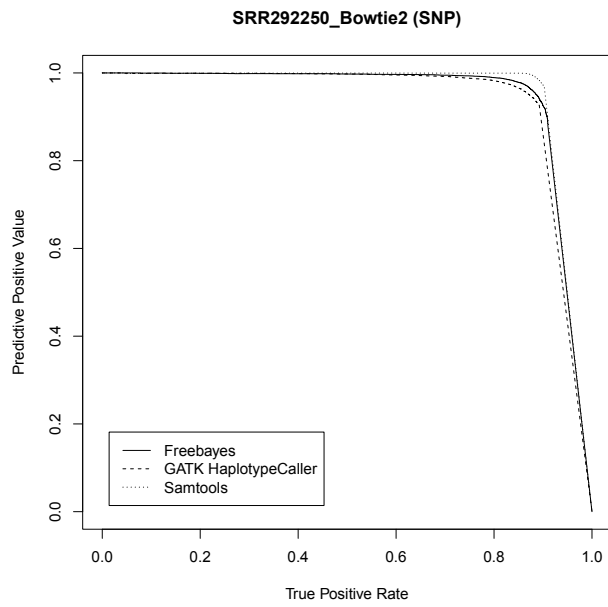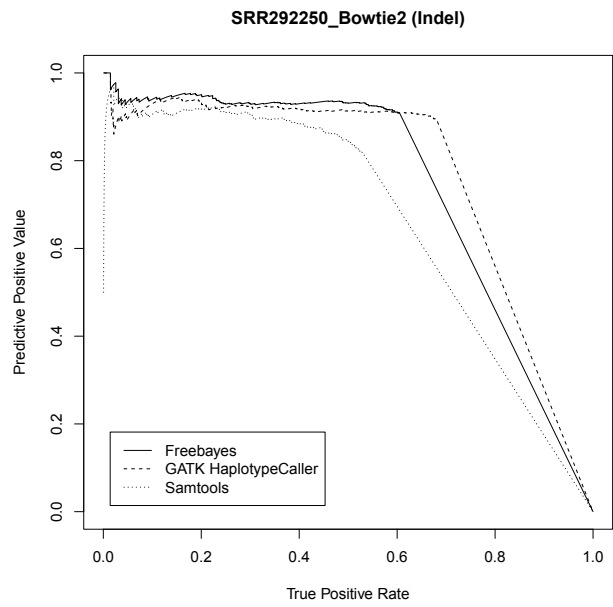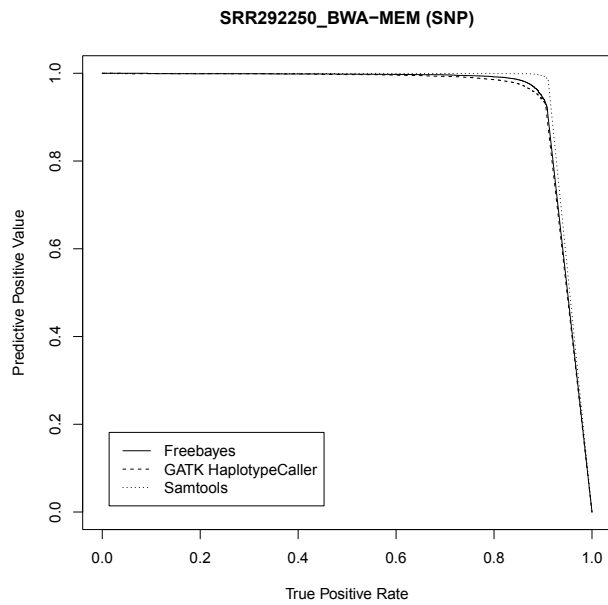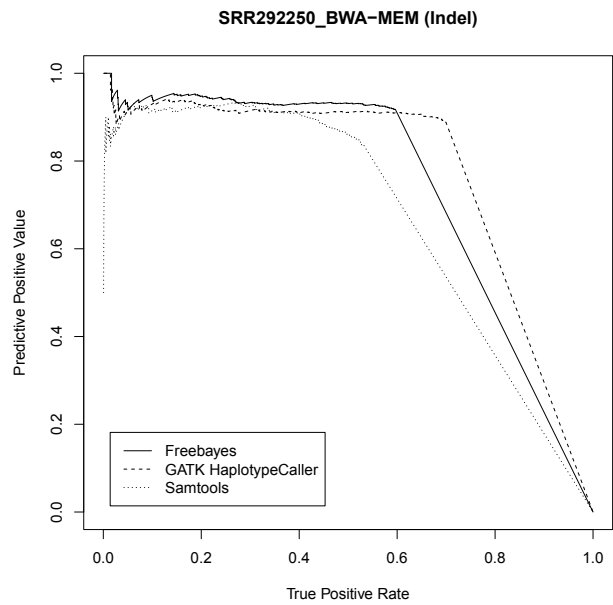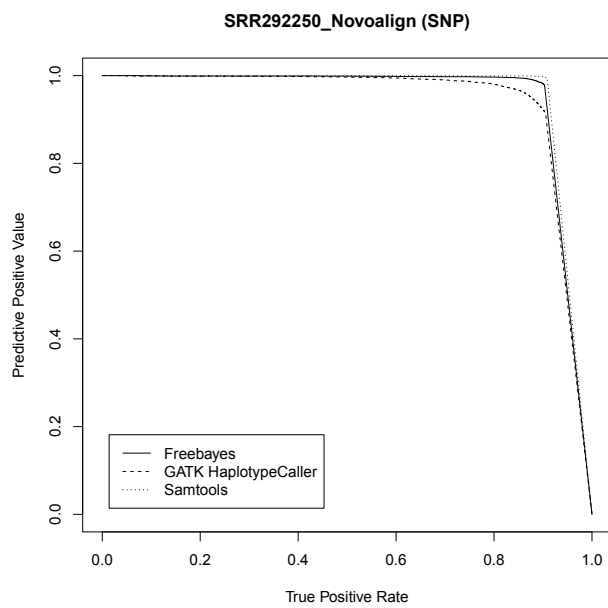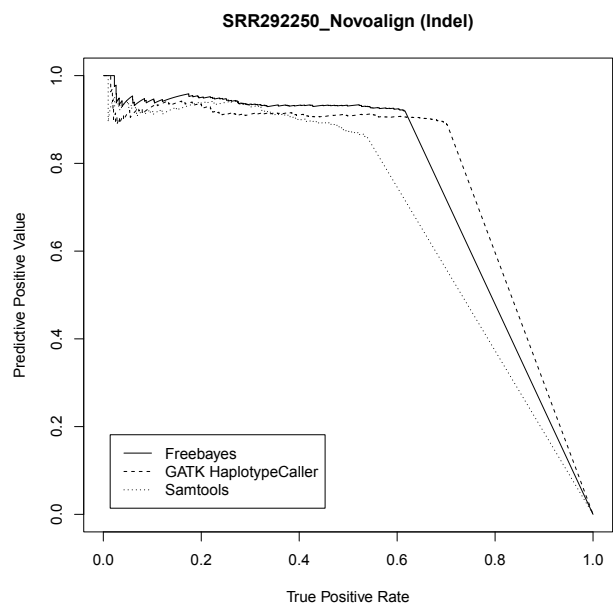

SRR098401\_Bowtie2 (SNP)

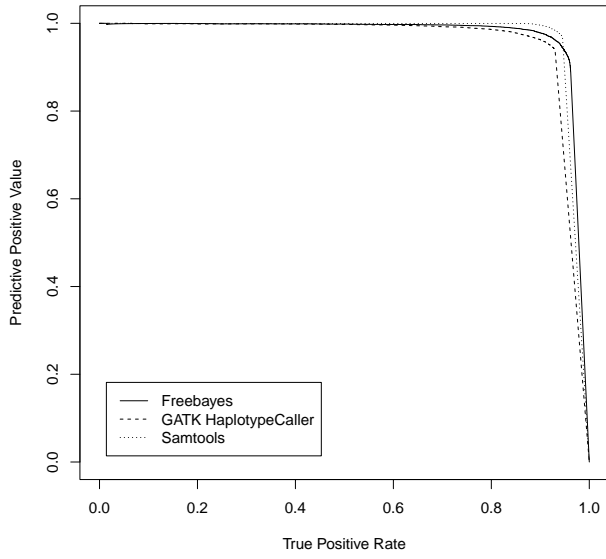

SRR098401\_Bowtie2 (Indel)

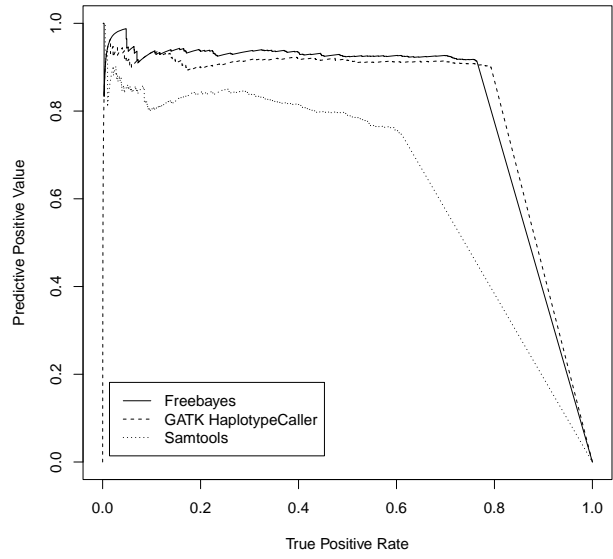

SRR098401\_BWA-MEM (SNP)

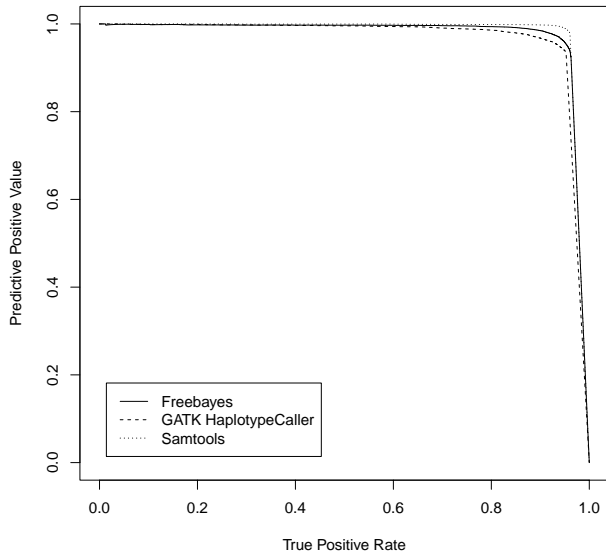

SRR098401\_BWA-MEM (Indel)

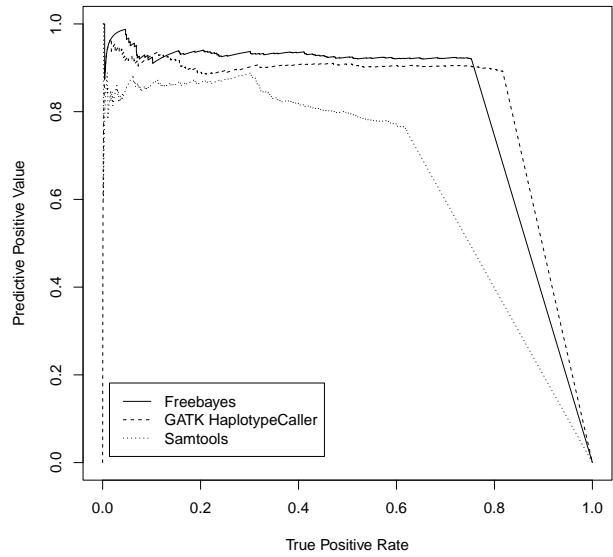

SRR098401\_Novoalign (SNP)

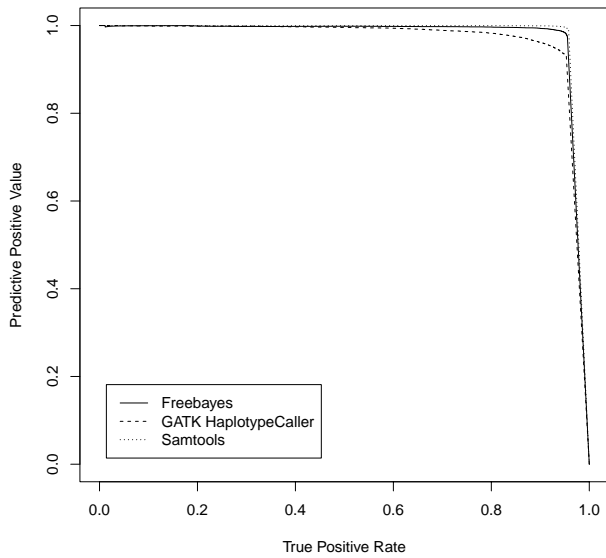

SRR098401\_Novoalign (Indel)

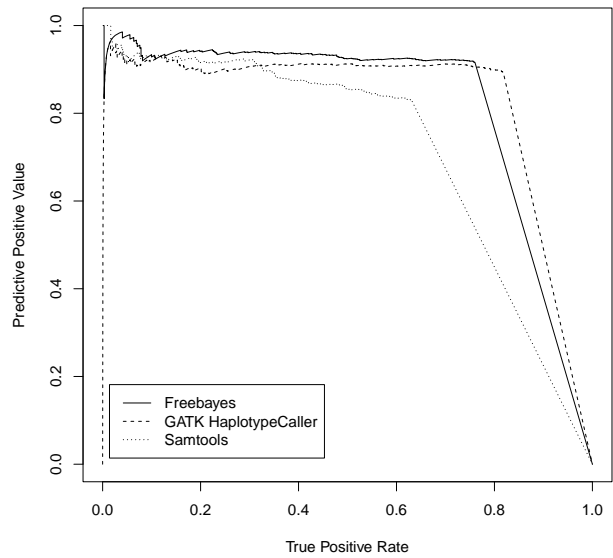

SRR515199\_Bowtie2 (SNP)

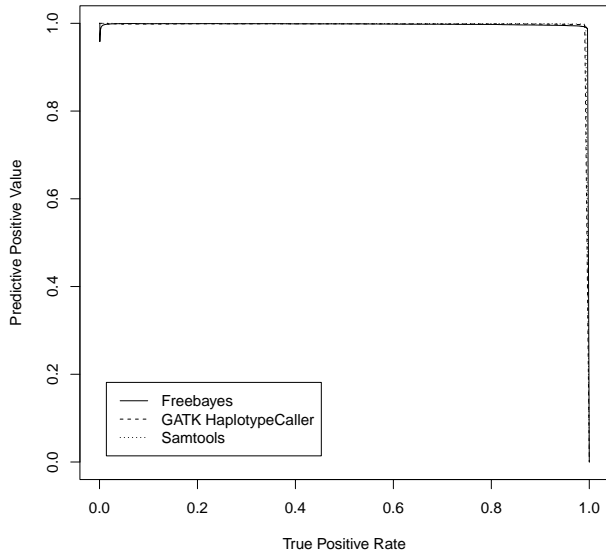

SRR515199\_Bowtie2 (Indel)

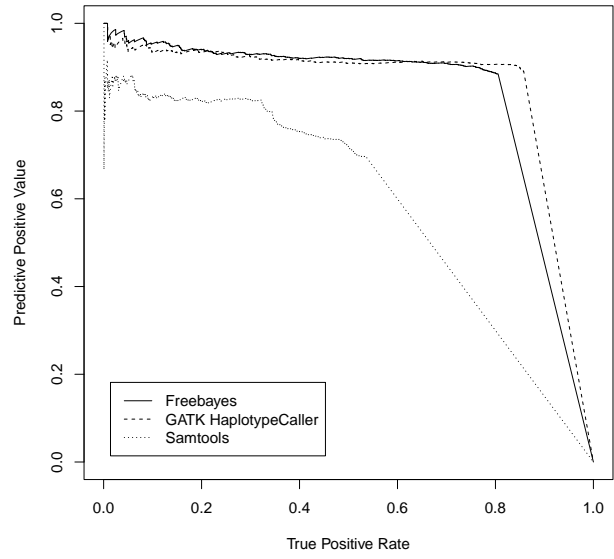

SRR515199\_BWA-MEM (SNP)

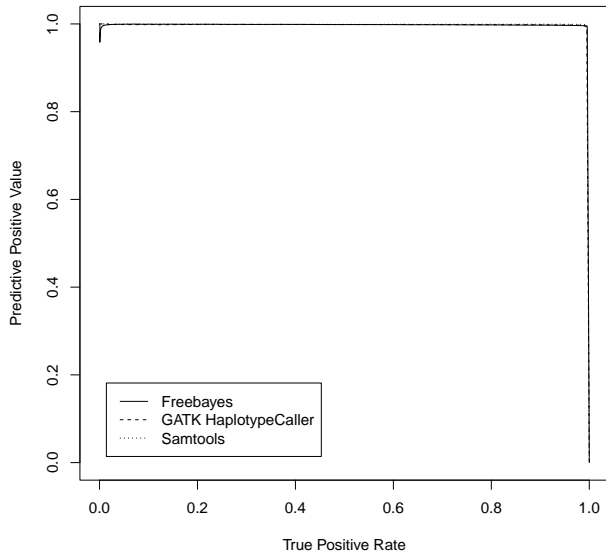

SRR515199\_BWA-MEM (Indel)

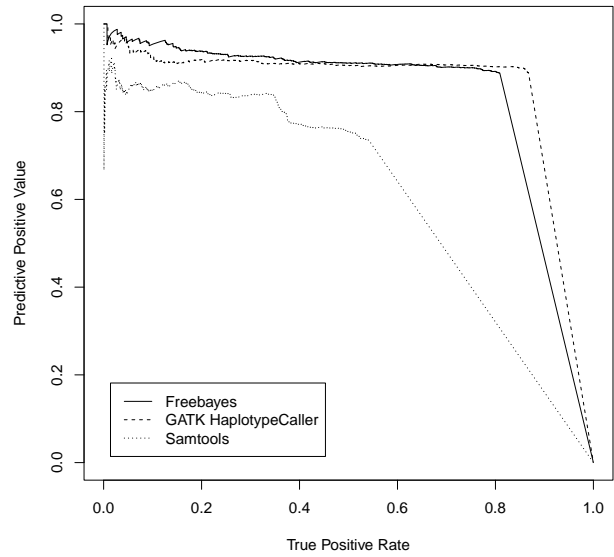

SRR515199\_Novoalign (SNP)

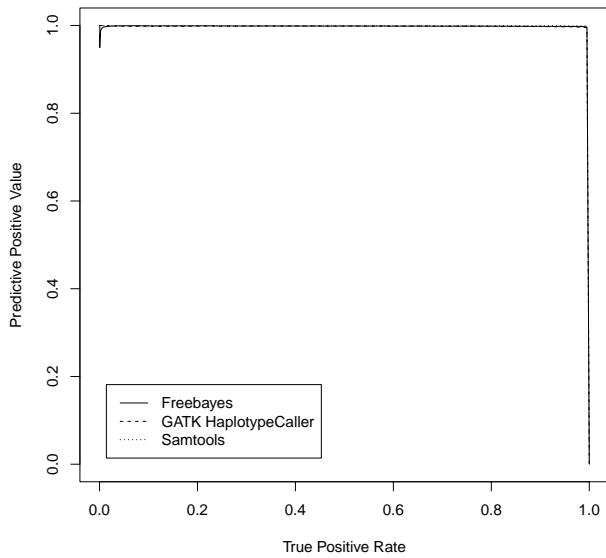

SRR515199\_Novoalign (Indel)

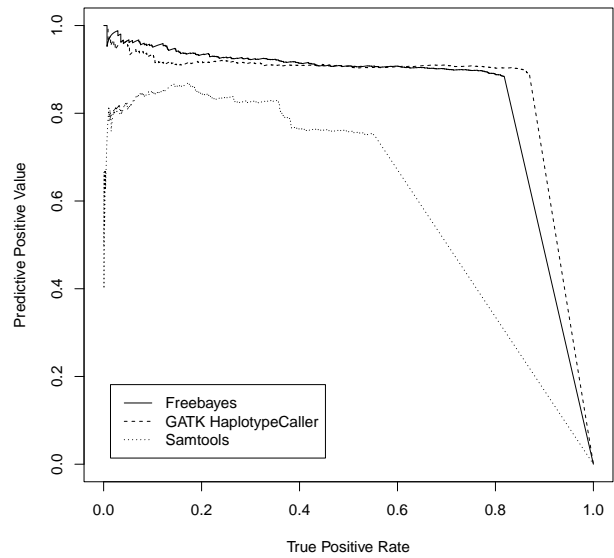

SRR1611178\_Bowtie2 (SNP)

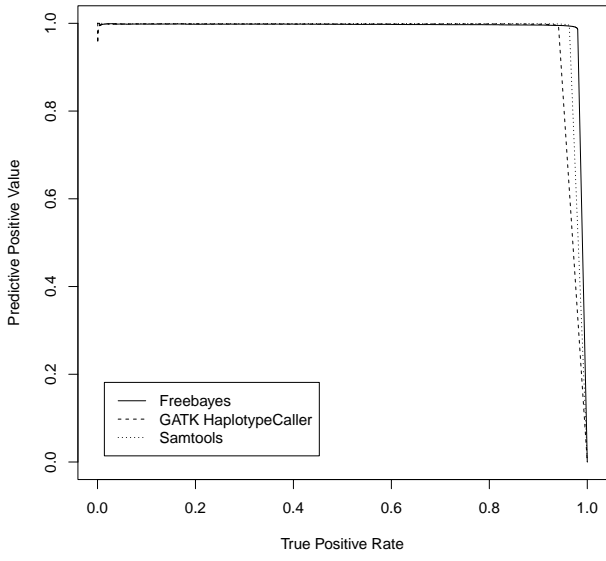

SRR1611178\_Bowtie2 (Indel)

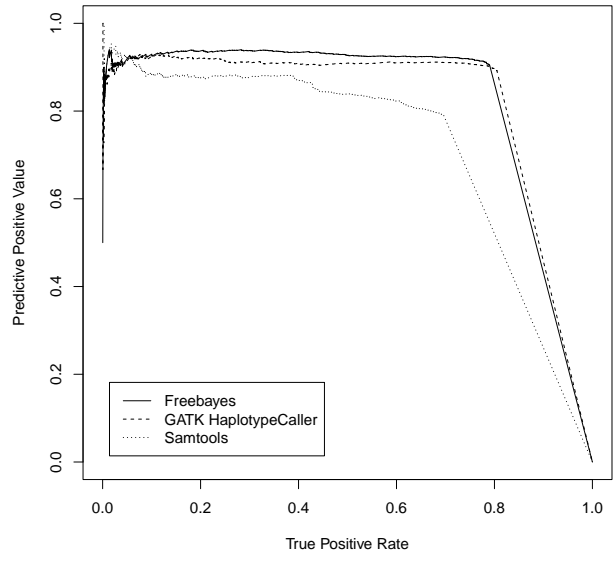

SRR1611178\_BWA-MEM (SNP)

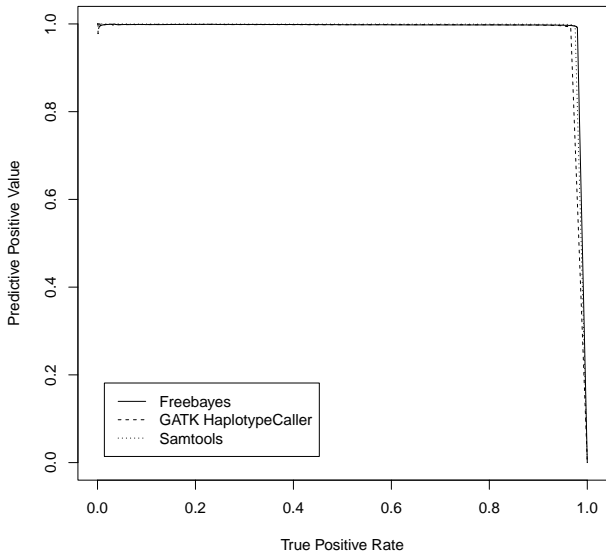

SRR1611178\_BWA-MEM (Indel)

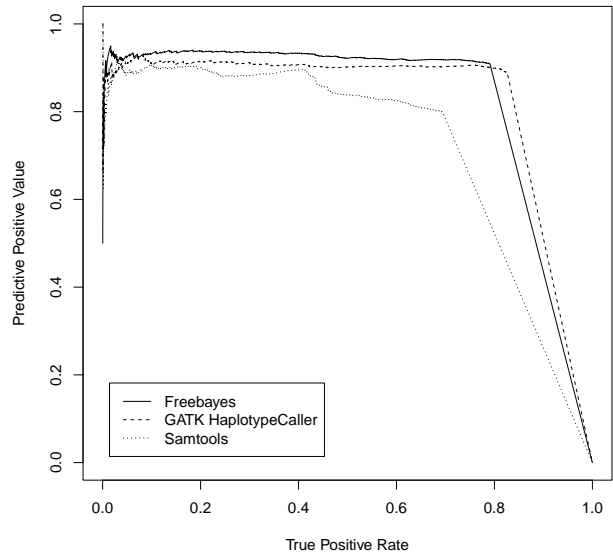

SRR1611178\_Novoalign (SNP)

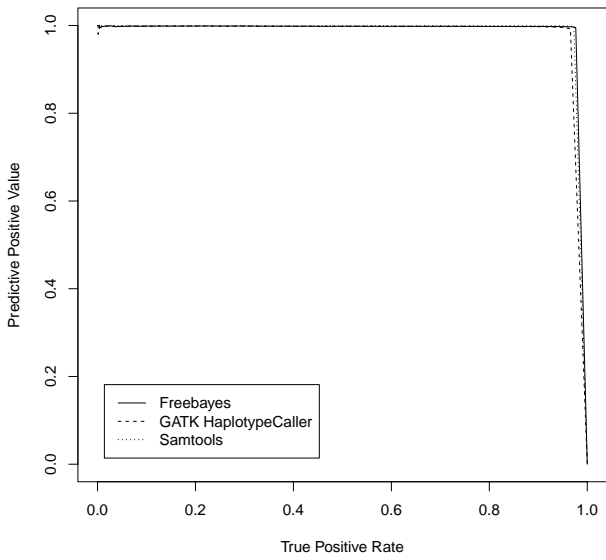

SRR1611178\_Novoalign (Indel)

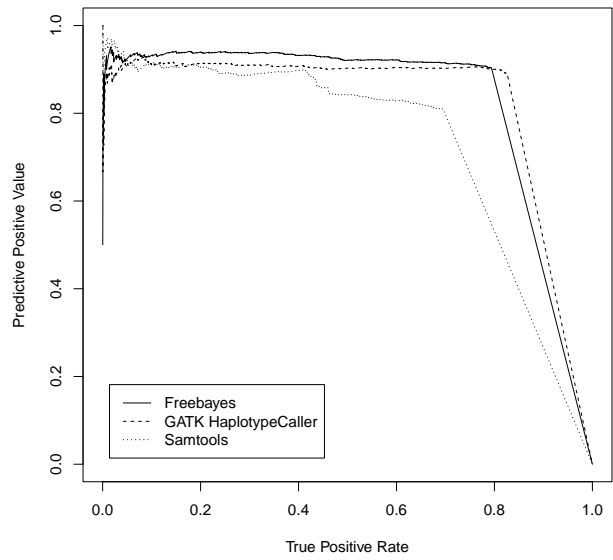

SRR1611179\_Bowtie2 (SNP)

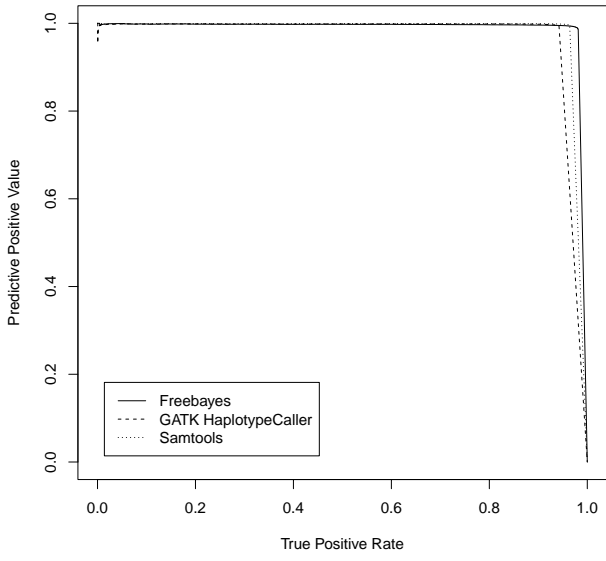

SRR1611179\_Bowtie2 (Indel)

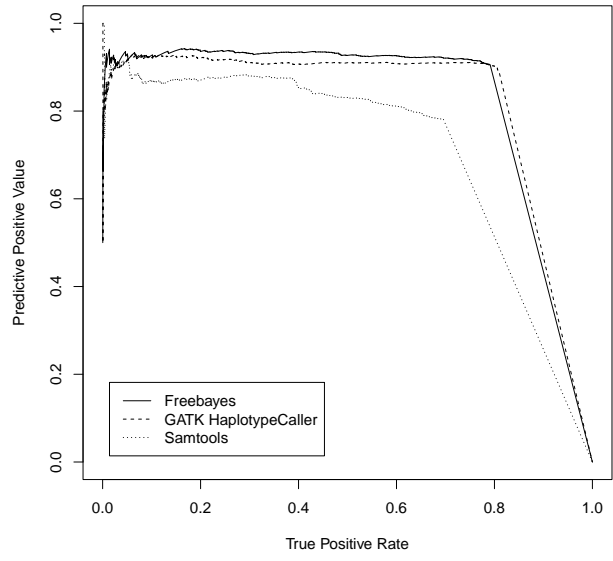

SRR1611179\_BWA-MEM (SNP)

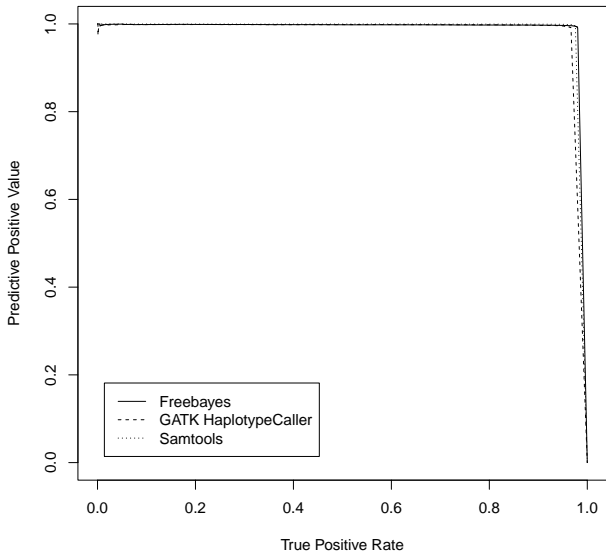

SRR1611179\_BWA-MEM (Indel)

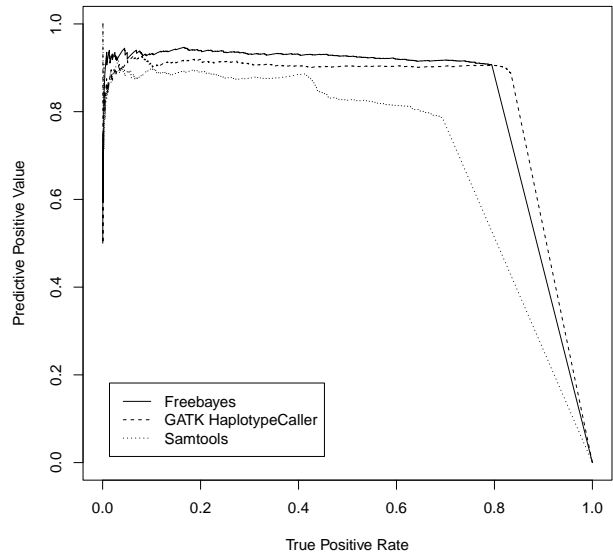

SRR1611179\_Novoalign (SNP)

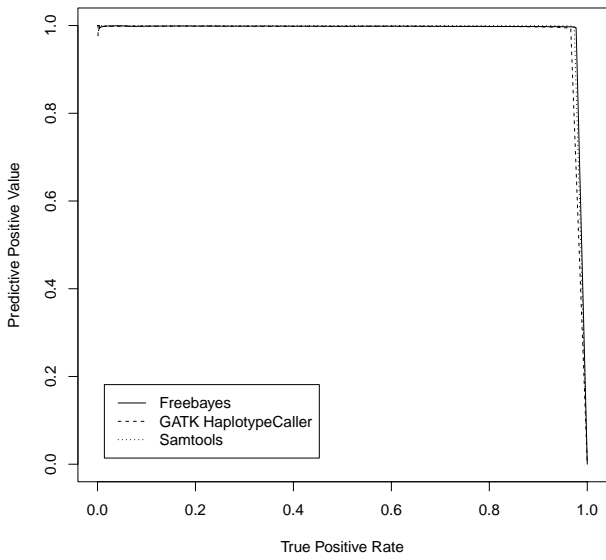

SRR1611179\_Novoalign (Indel)

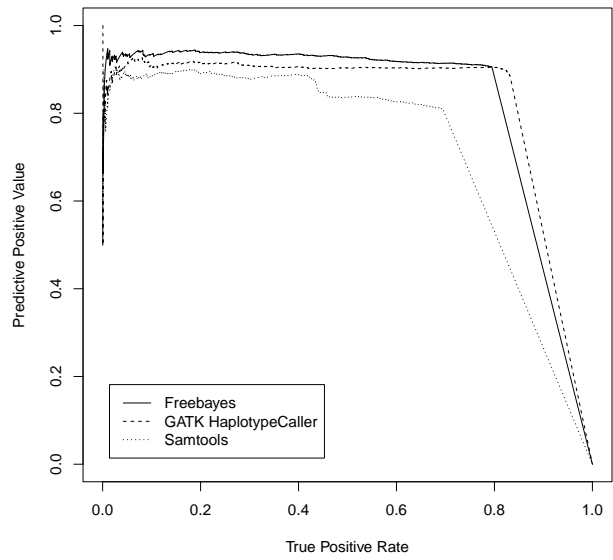

SRR1611183\_Bowtie2 (SNP)

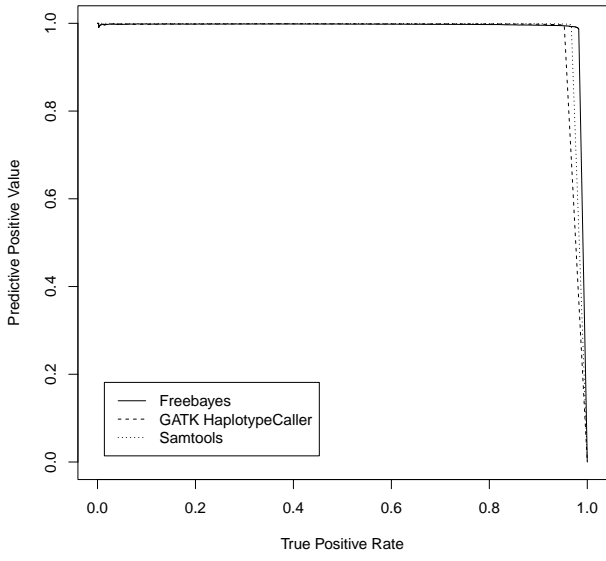

SRR1611183\_Bowtie2 (Indel)

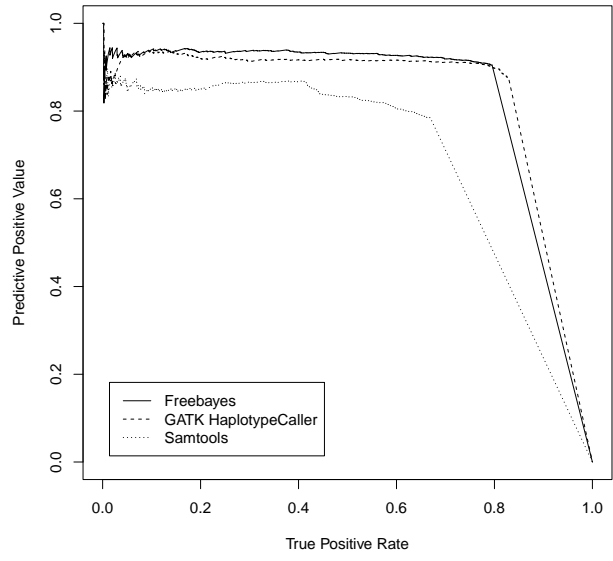

SRR1611183\_BWA-MEM (SNP)

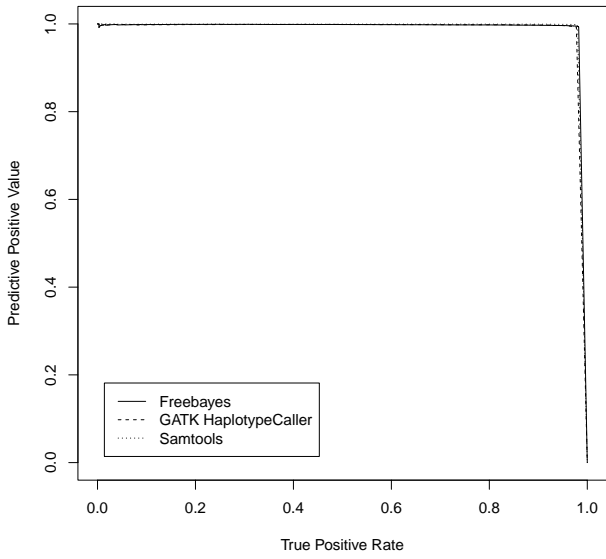

SRR1611183\_BWA-MEM (Indel)

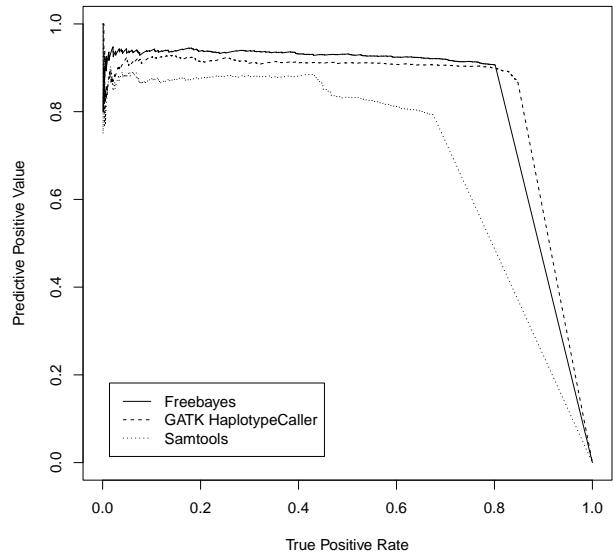

SRR1611183\_Novoalign (SNP)

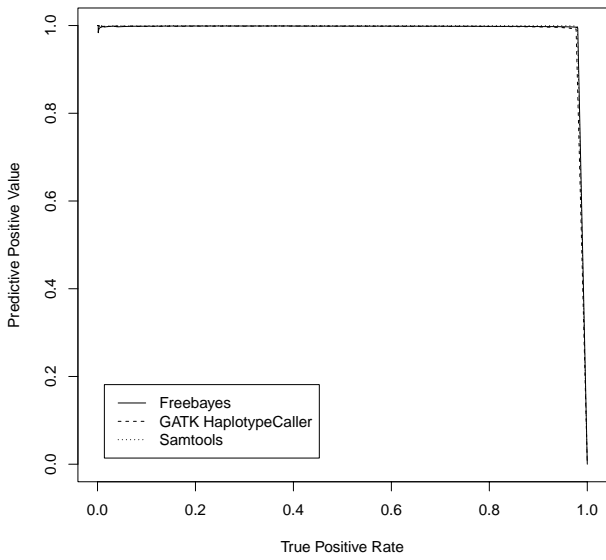

SRR1611183\_Novoalign (Indel)

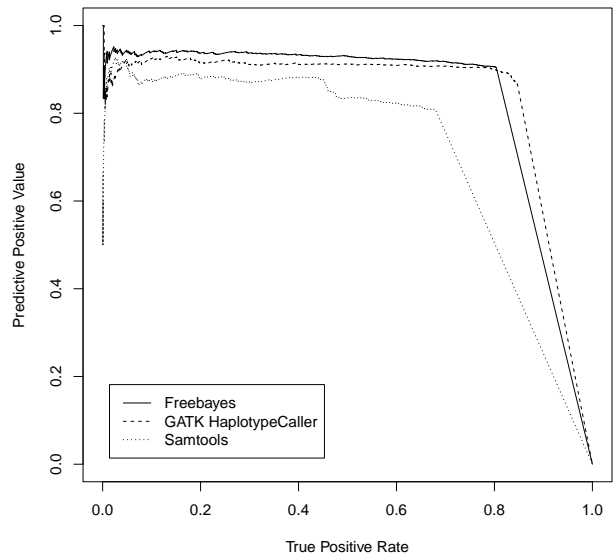

SRR1611184\_Bowtie2 (SNP)

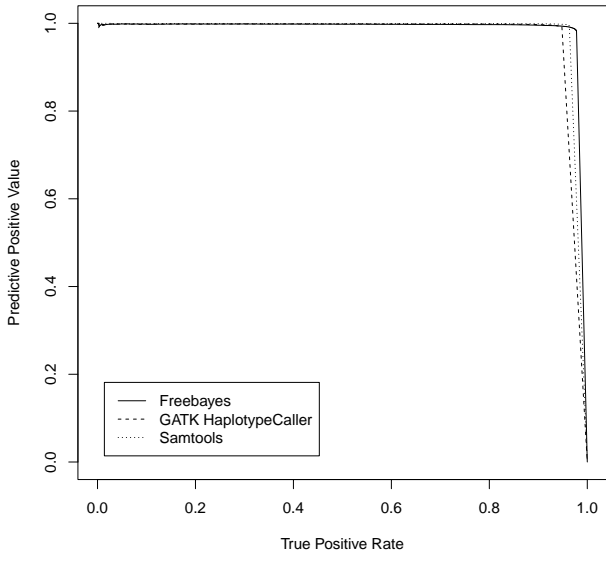

SRR1611184\_Bowtie2 (Indel)

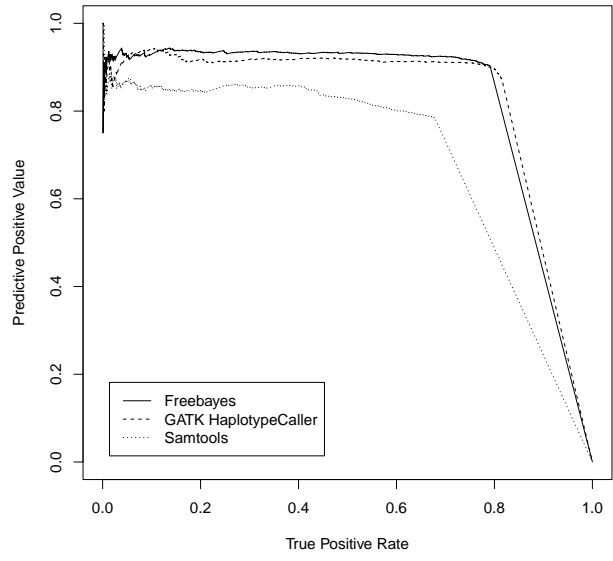

SRR1611184\_BWA-MEM (SNP)

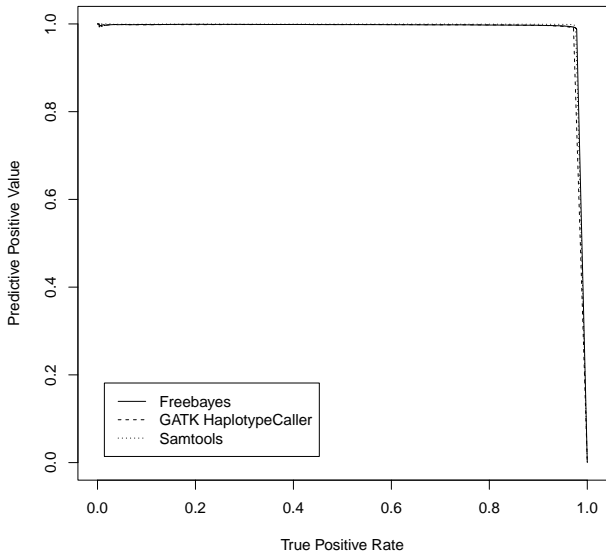

SRR1611184\_BWA-MEM (Indel)

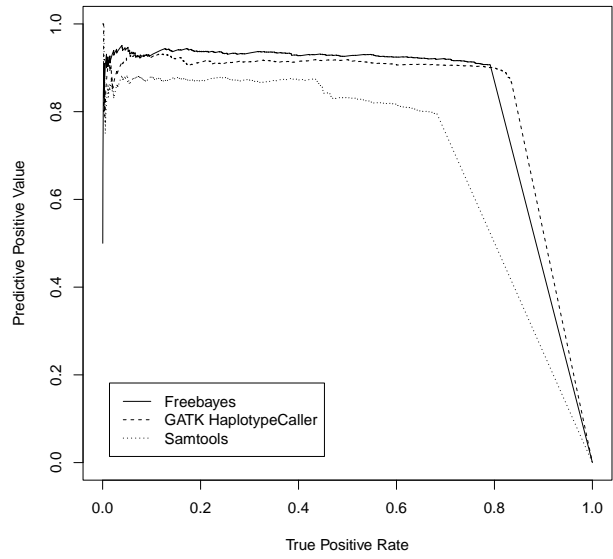

SRR1611184\_Novoalign (SNP)

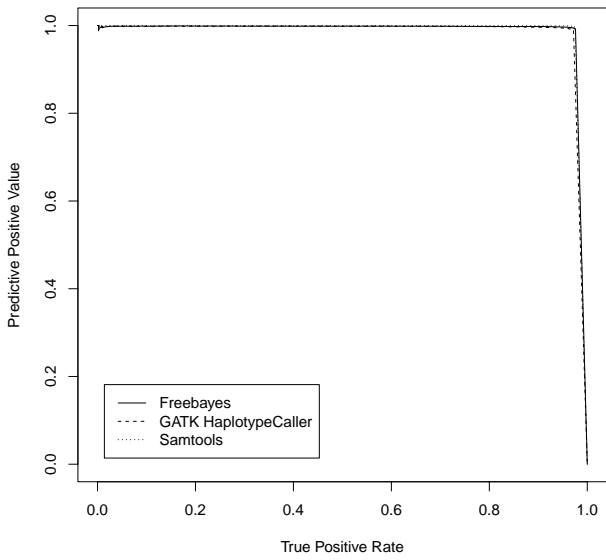

SRR1611184\_Novoalign (Indel)

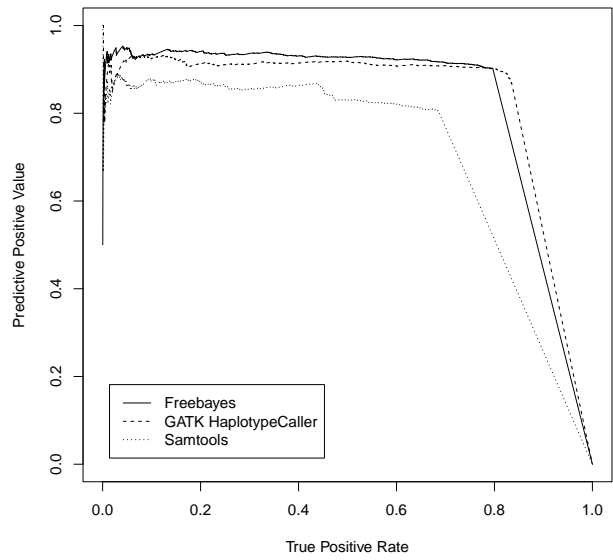



ERR194147\_Bowtie2 (SNP)

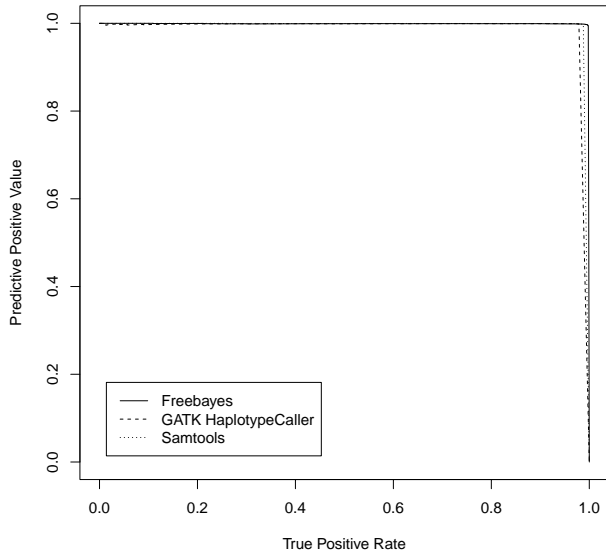

ERR194147\_Bowtie2 (Indel)

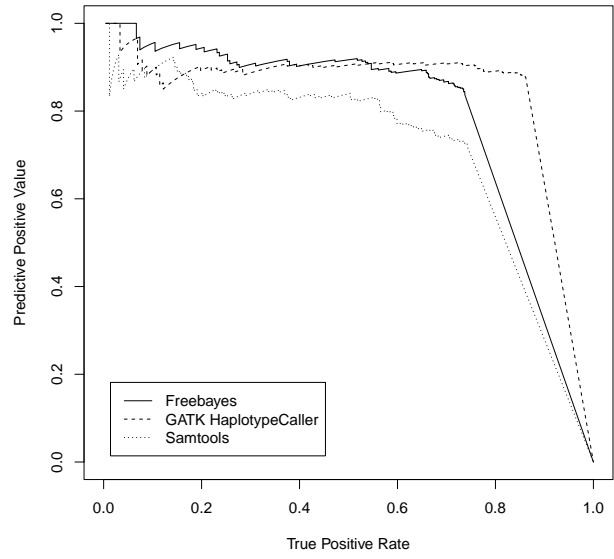

ERR194147\_BWA-MEM (SNP)

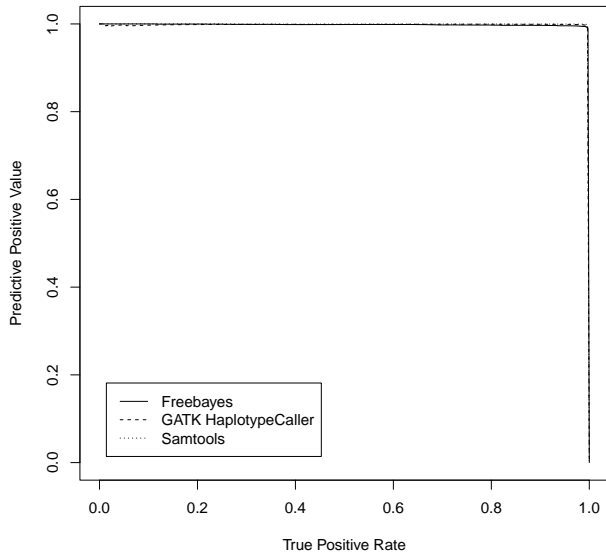

ERR194147\_BWA-MEM (Indel)

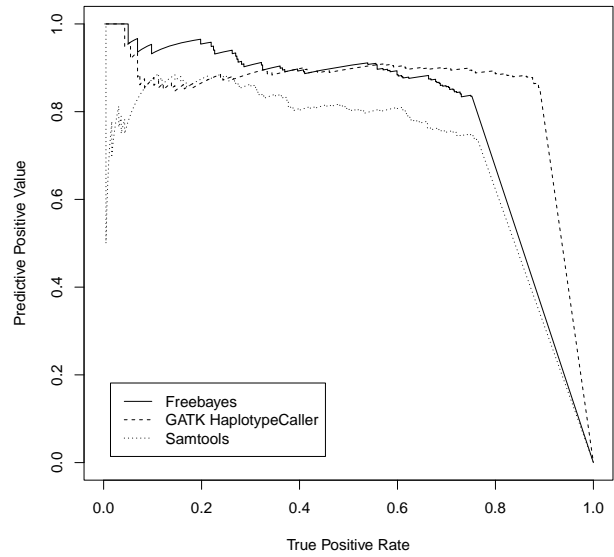

ERR194147\_Novoalign (SNP)

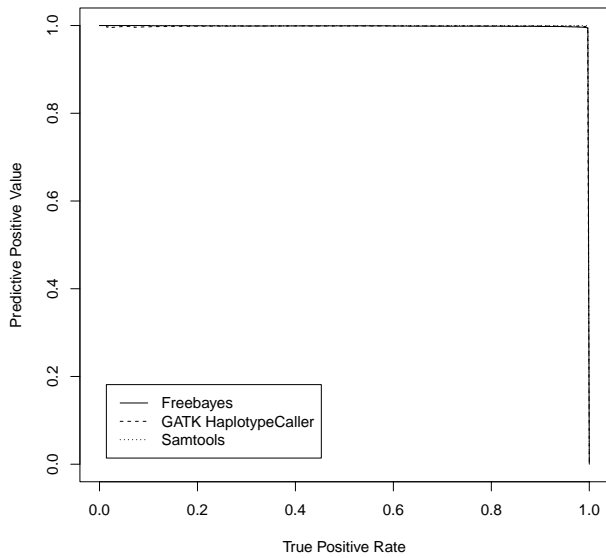

ERR194147\_Novoalign (Indel)

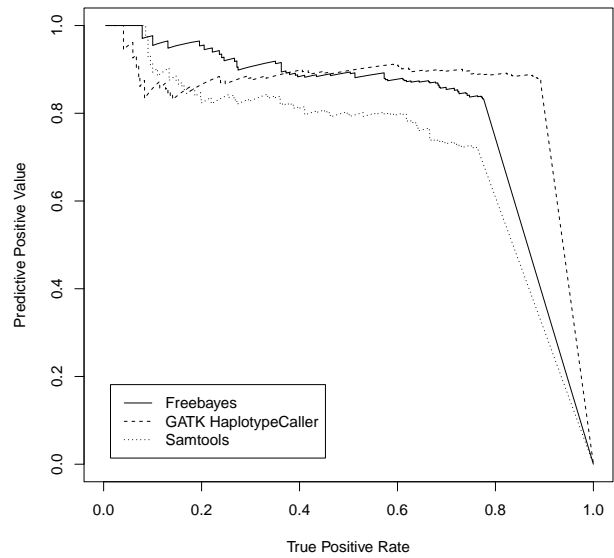

SRX485062\_Bowtie2 (SNP)

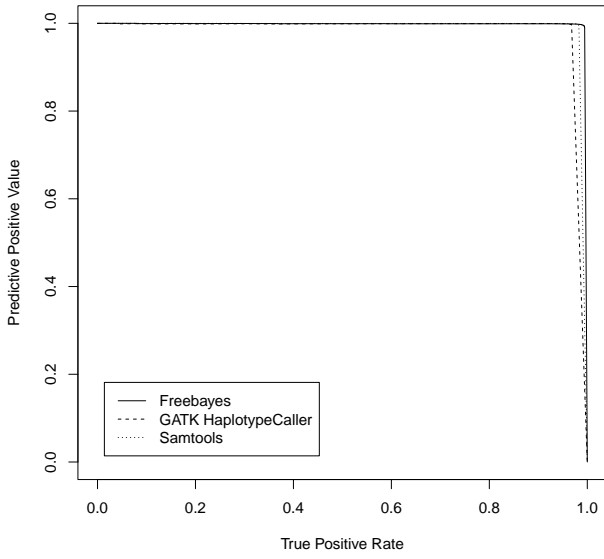

SRX485062\_Bowtie2 (Indel)

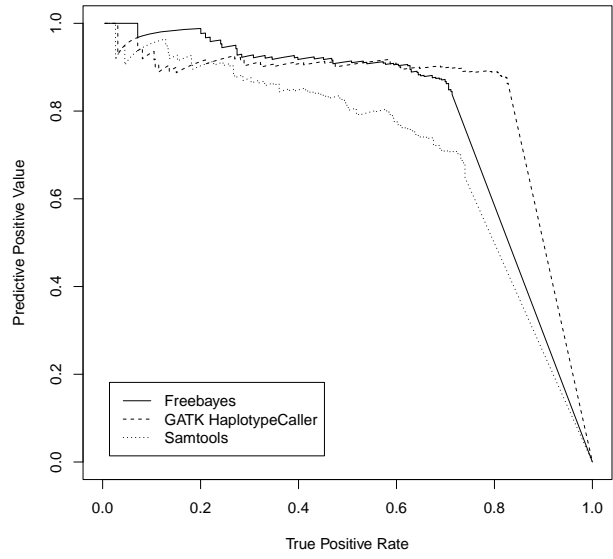

SRX485062\_BWA-MEM (SNP)

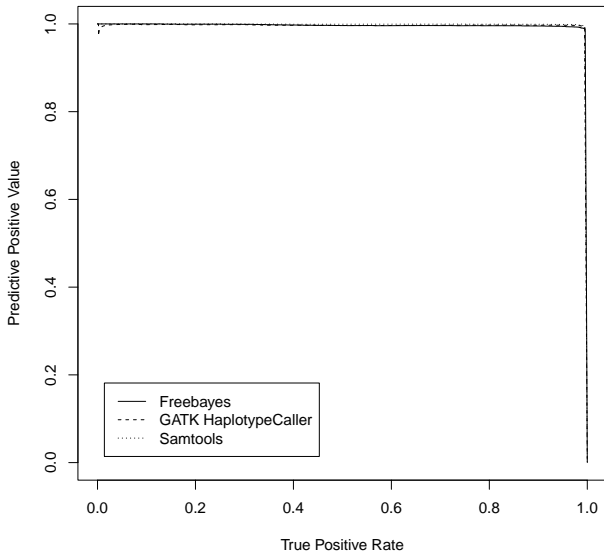

SRX485062\_BWA-MEM (Indel)

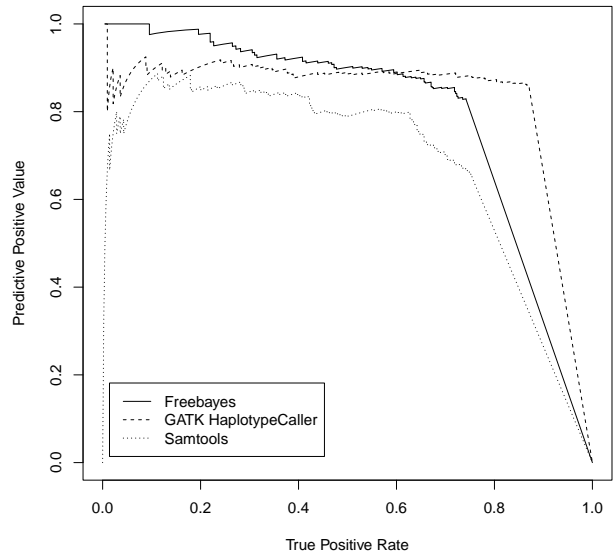

SRX485062\_Novoalign (SNP)

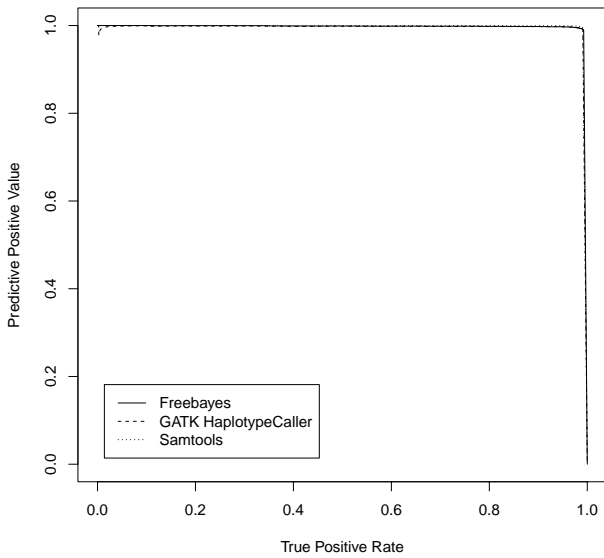

SRX485062\_Novoalign (Indel)

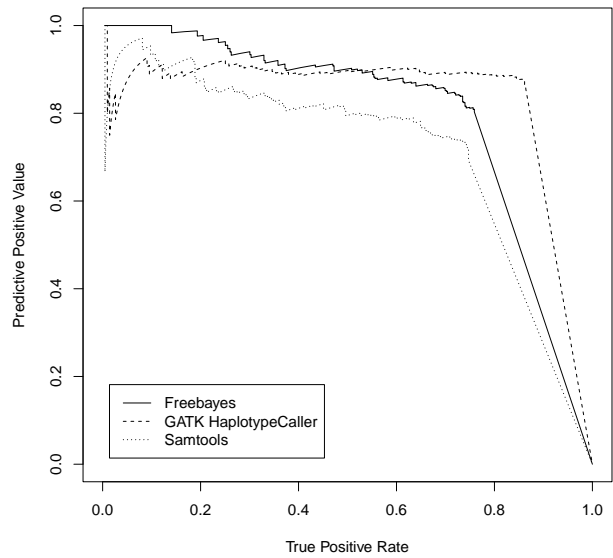

SRX515284\_Bowtie2 (SNP)

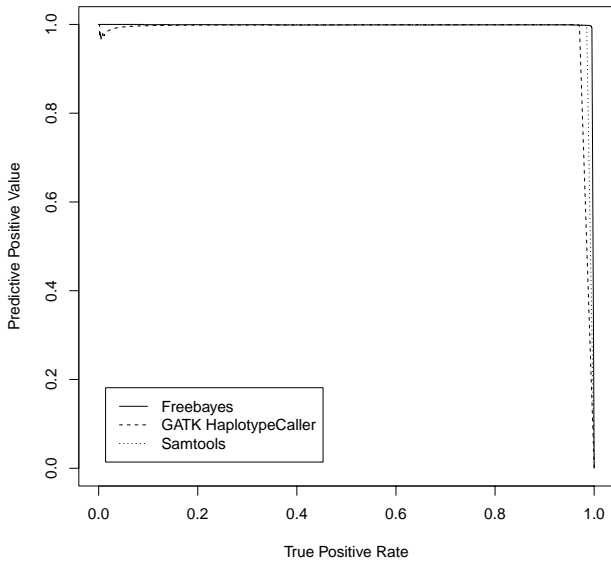

SRX515284\_Bowtie2 (Indel)

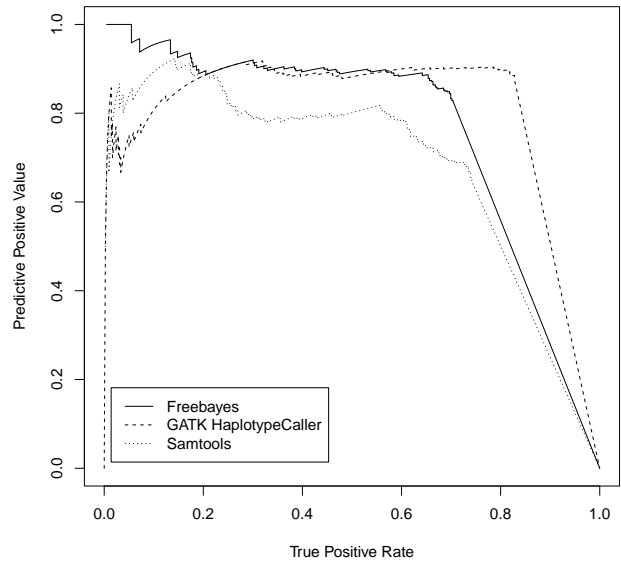

SRX515284\_BWA-MEM (SNP)

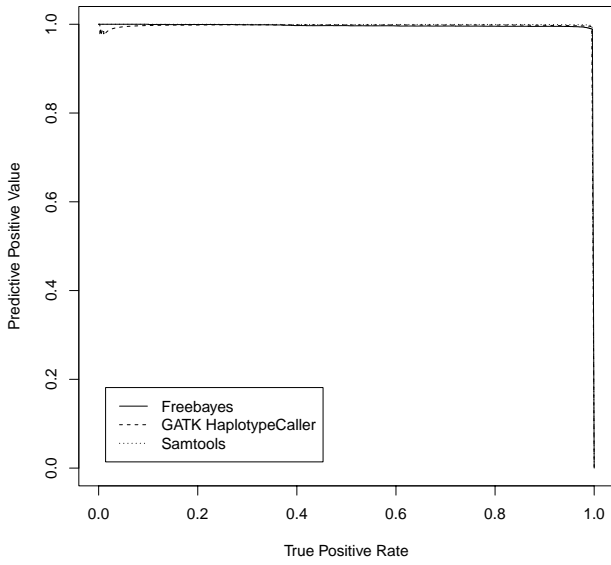

SRX515284\_BWA-MEM (Indel)

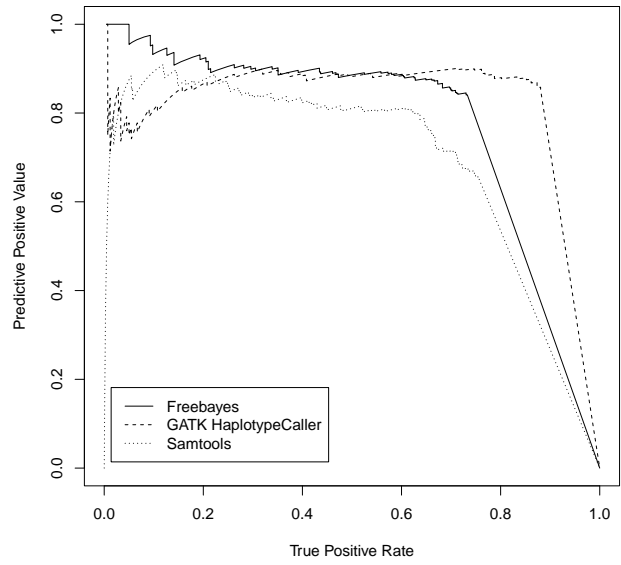

SRX515284\_Novoalign (SNP)

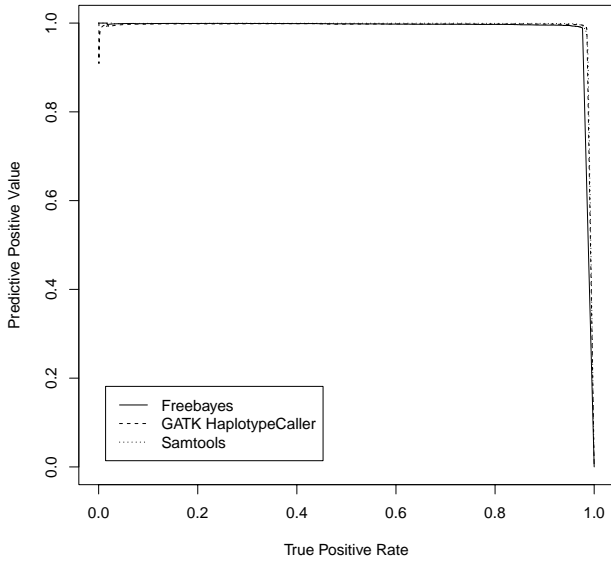

SRX515284\_Novoalign (Indel)

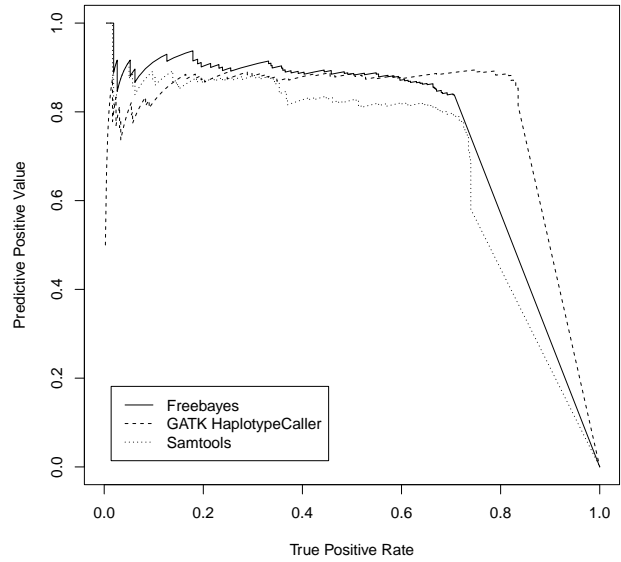

SRX516752\_Bowtie2 (SNP)

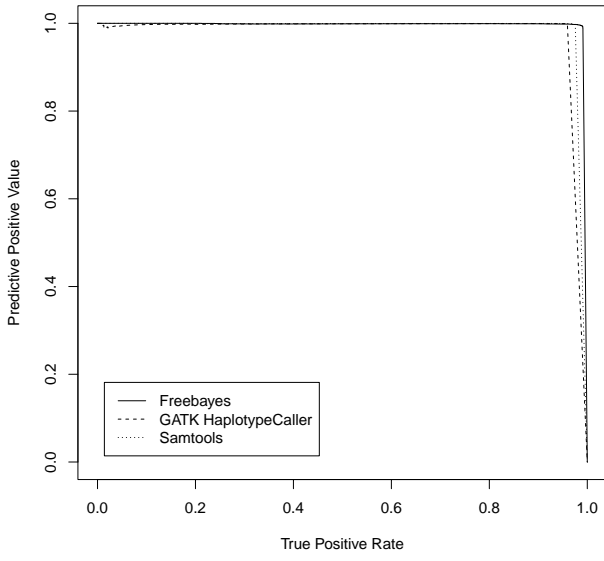

SRX516752\_Bowtie2 (Indel)

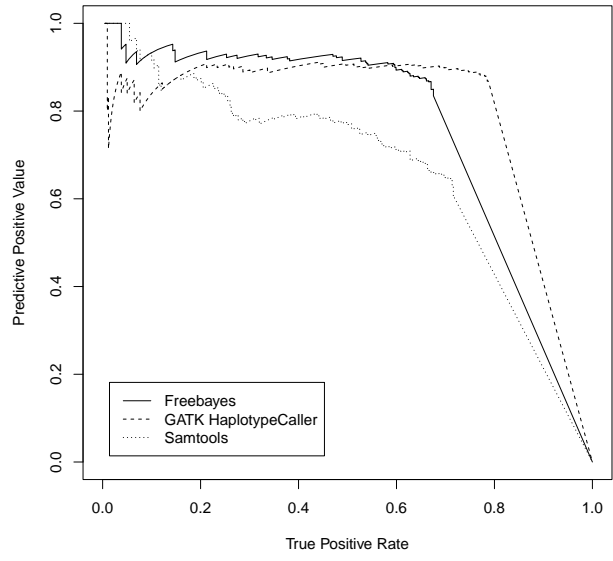

SRX516752\_BWA-MEM (SNP)

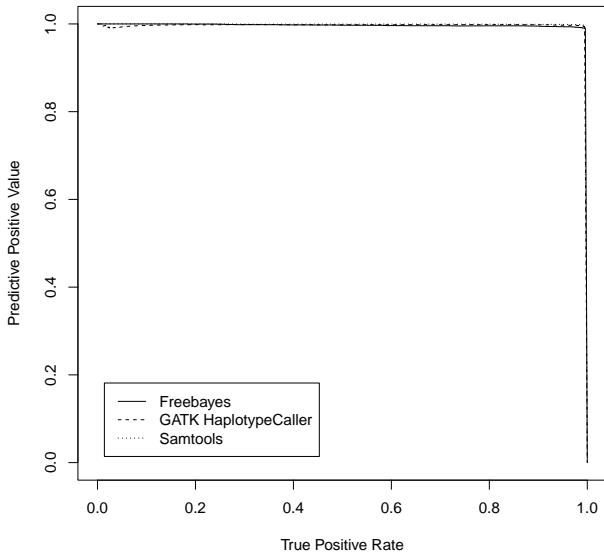

SRX516752\_BWA-MEM (Indel)

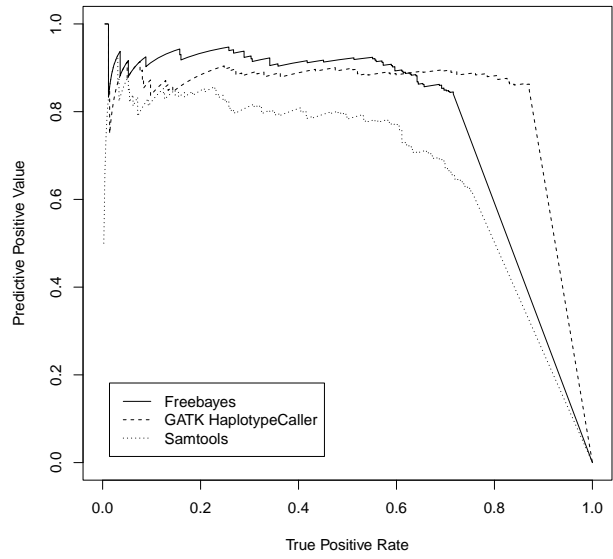

SRX516752\_Novoalign (SNP)

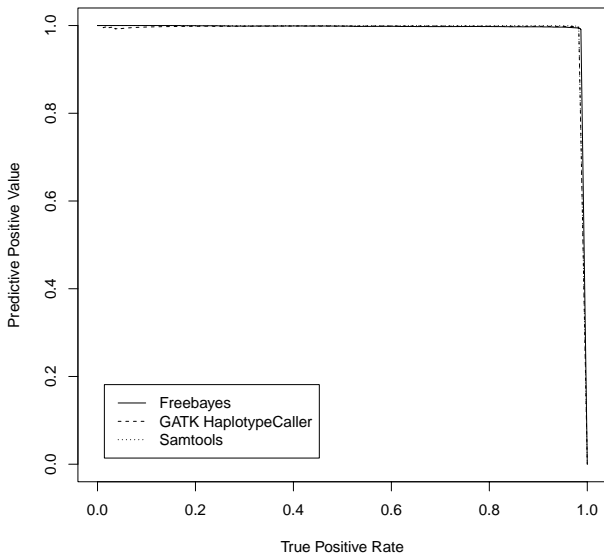

SRX516752\_Novoalign (Indel)

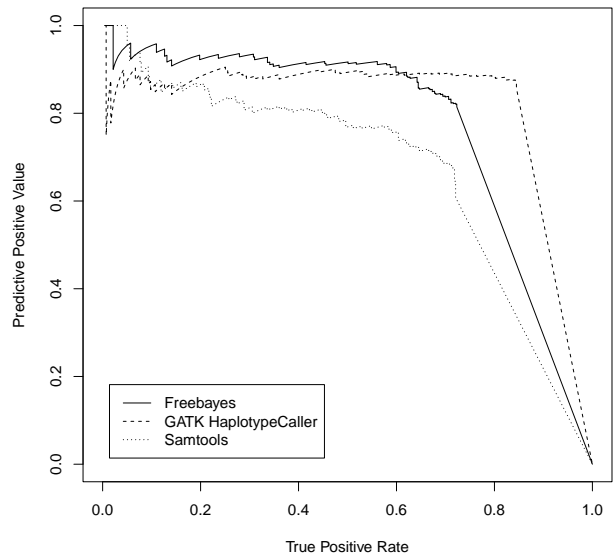

IonProton\_Tmap (SNP)

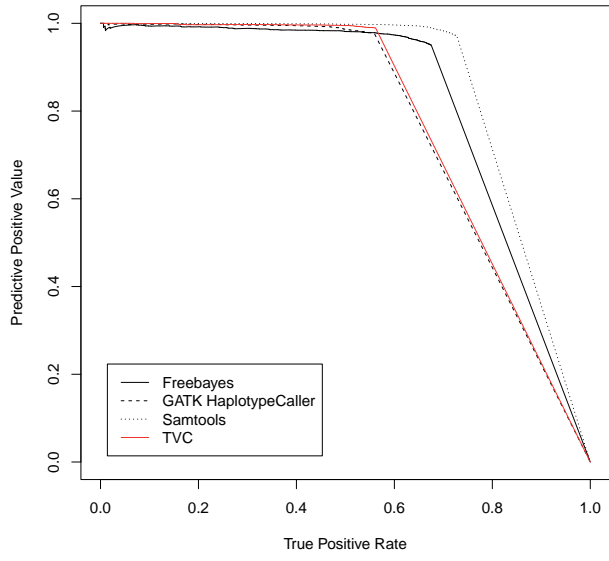

IonProton\_Tmap (Indel)

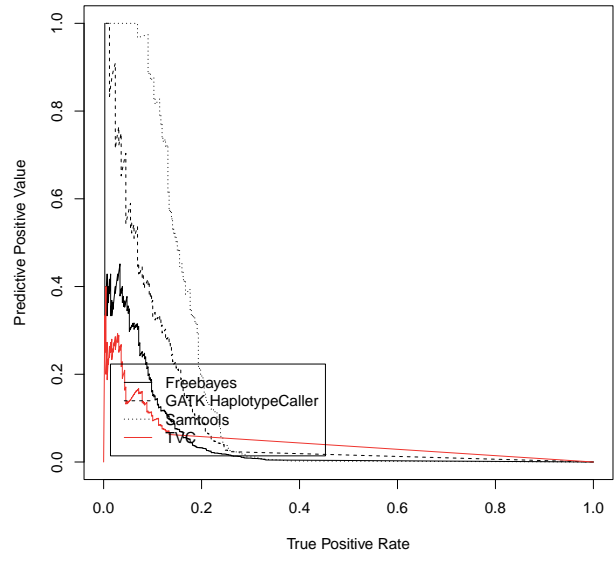

**Supplementary Figure 2. Summary of variant calling performances by thirteen pipelines, with filtration of low scored variants.** Performances were measured for (A) SNPs and (B) indels with score higher than 20 only.

**A**

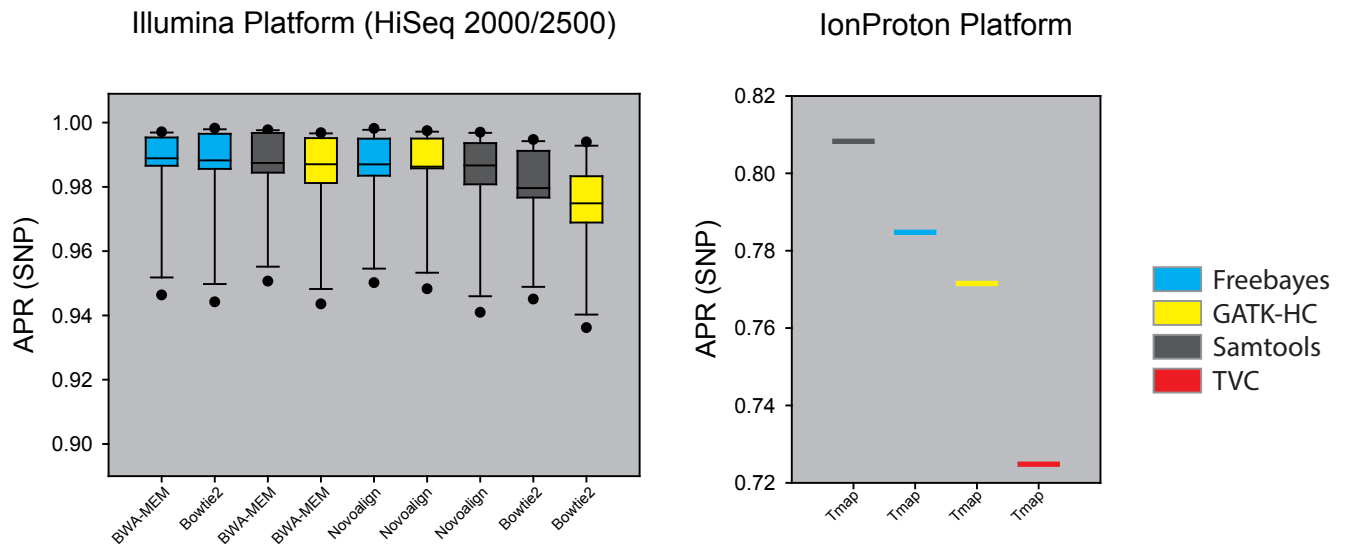

**B**

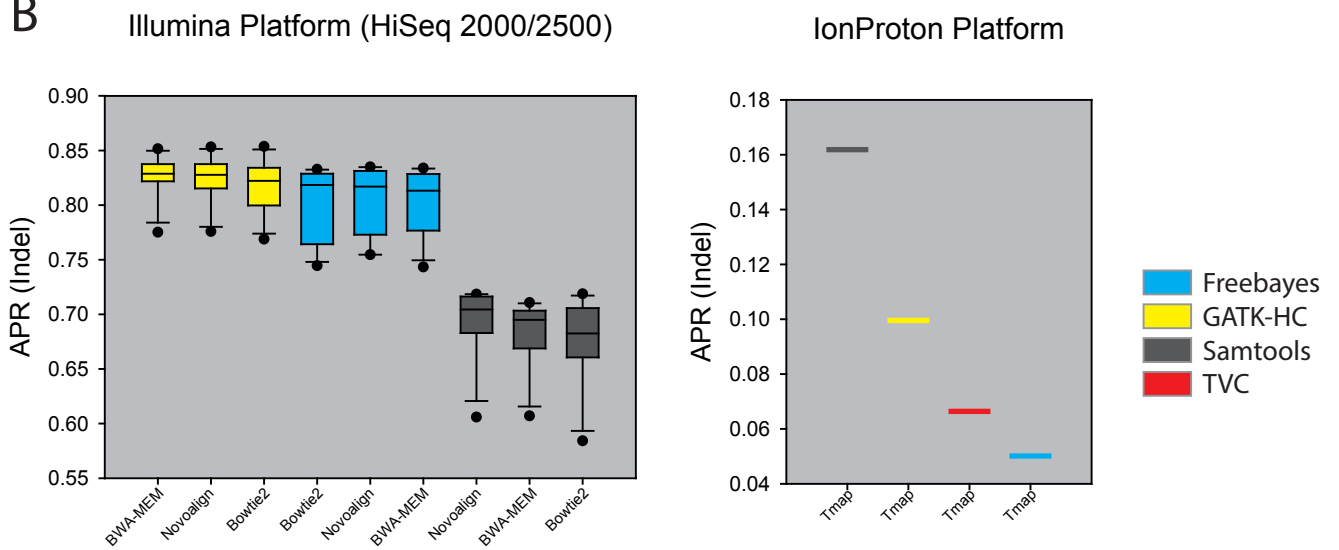

Supplementary Figure 3. Plots of exome coverage vs. APR for SNP and indel.

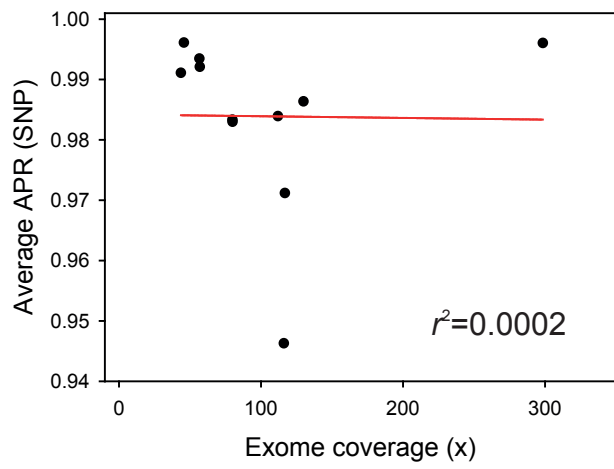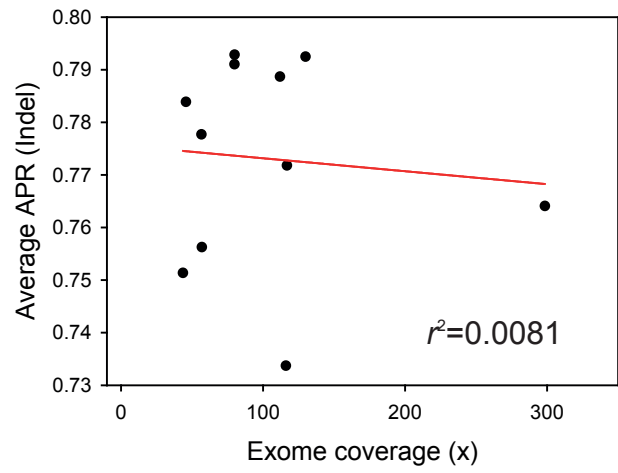

**Supplementary Figure 4. Summary of variant calling performances by thirteen pipelines, based on PPV. Performances were measured by PPV rather than APR for (A) SNPs and (B) indels.**

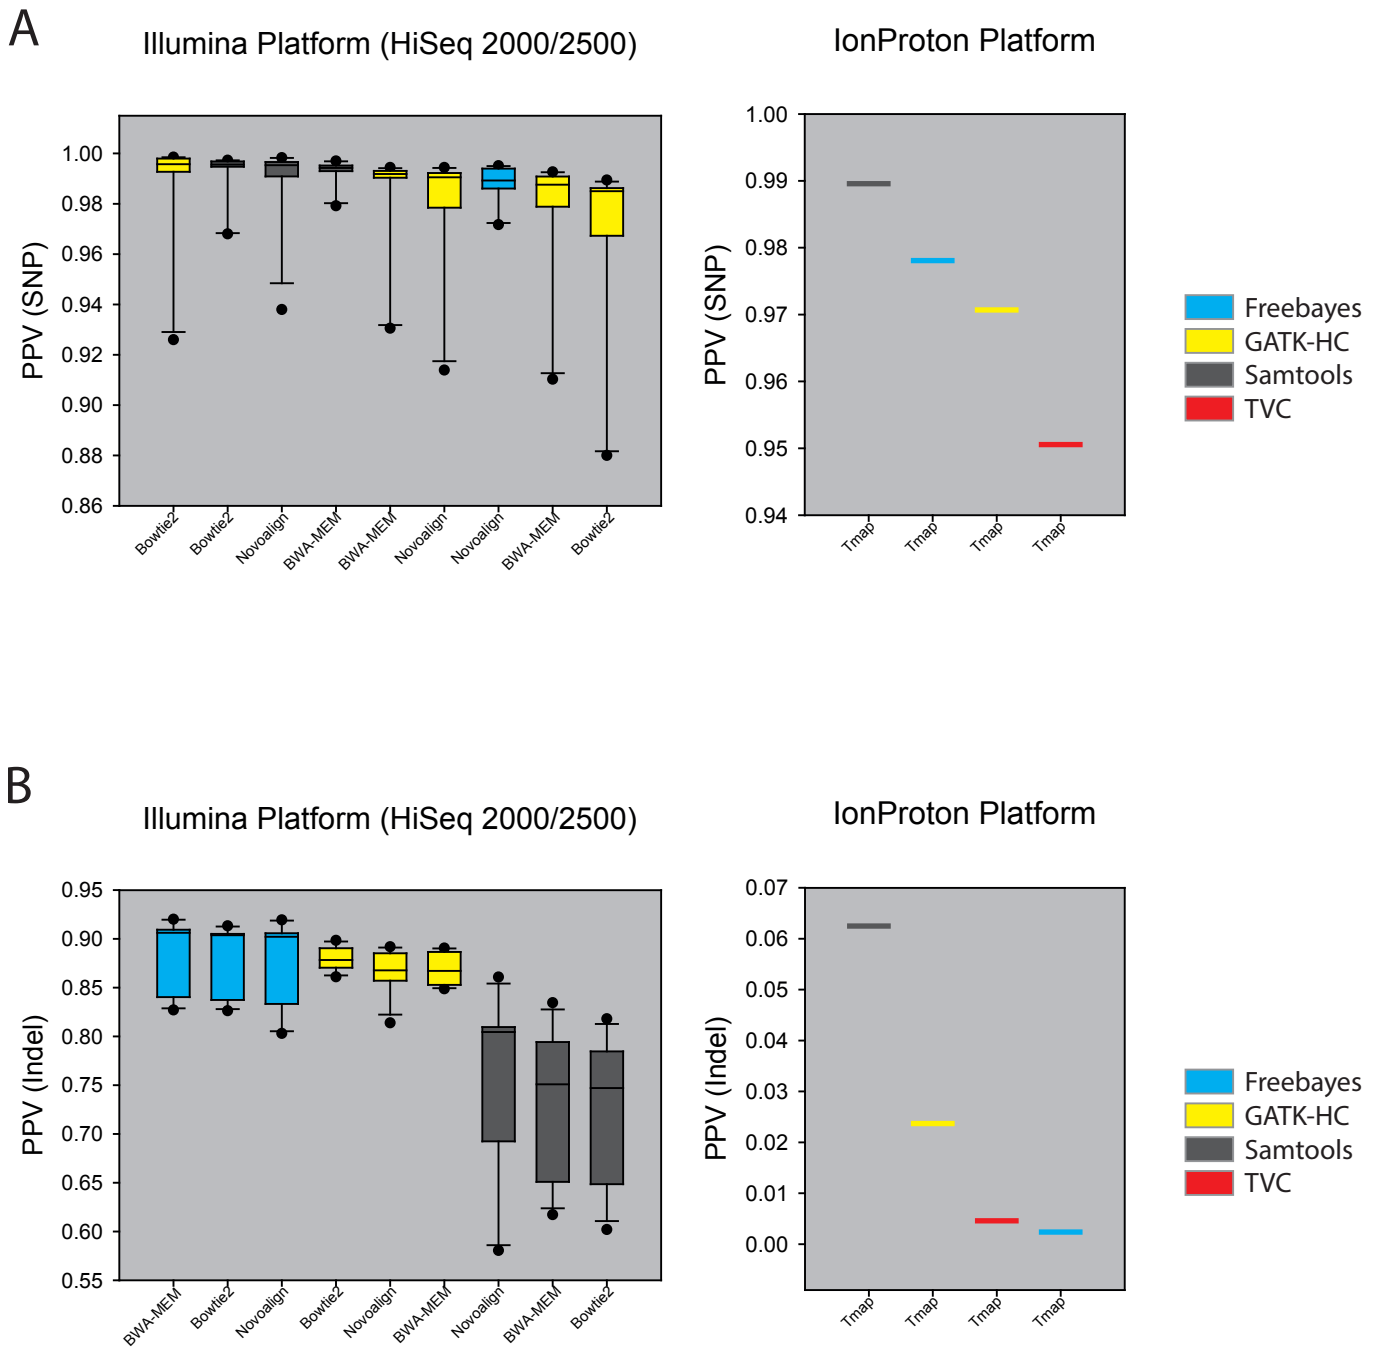



**Supplementary Table 1. Summary table of performance of SNP calling from twelve data sets using thirteen pipelines.**

| SNP                   | Area under Precision-Recall curve(APR) |          |           | True Positive(TP)      |         |          |           | False Positive(FP) |          |           |
|-----------------------|----------------------------------------|----------|-----------|------------------------|---------|----------|-----------|--------------------|----------|-----------|
|                       | GATK-HC                                | Samtools | Freebayes | # of gold standard SNP | GATK-HC | Samtools | Freebayes | GATK-HC            | Samtools | Freebayes |
| SRR1611178-BWA-MEM    | 0.981                                  | 0.987    | 0.988     | 40532                  | 39162   | 39524    | 39713     | 322                | 243      | 368       |
| SRR1611179-BWA-MEM    | 0.981                                  | 0.987    | 0.988     | 40532                  | 39183   | 39547    | 39739     | 346                | 229      | 380       |
| SRR292250-BWA-MEM     | 0.944                                  | 0.954    | 0.947     | 26263                  | 23769   | 23916    | 23884     | 1774               | 376      | 2354      |
| SRR515199-BWA-MEM     | 0.996                                  | 0.997    | 0.996     | 32470                  | 32304   | 32320    | 32337     | 181                | 97       | 257       |
| SRR098401-BWA-MEM     | 0.967                                  | 0.979    | 0.975     | 25870                  | 24640   | 24847    | 24906     | 1660               | 528      | 2096      |
| SRR1611183-BWA-MEM    | 0.987                                  | 0.990    | 0.989     | 40532                  | 39628   | 39726    | 39821     | 275                | 150      | 295       |
| SRR1611184-BWA-MEM    | 0.984                                  | 0.988    | 0.987     | 40532                  | 39392   | 39566    | 39656     | 375                | 201      | 521       |
| SRX485062-BWA-MEM     | 0.994                                  | 0.997    | 0.995     | 17567                  | 17468   | 17481    | 17494     | 170                | 115      | 231       |
| ERR194147-BWA-MEM     | 0.997                                  | 0.998    | 0.997     | 17567                  | 17500   | 17507    | 17523     | 135                | 84       | 379       |
| SRX515284-BWA-MEM     | 0.995                                  | 0.997    | 0.995     | 17567                  | 17482   | 17491    | 17504     | 141                | 124      | 220       |
| SRX516752-BWA-MEM     | 0.995                                  | 0.997    | 0.995     | 17567                  | 17471   | 17485    | 17498     | 122                | 91       | 208       |
| SRR1611178-Bowtie2    | 0.969                                  | 0.981    | 0.988     | 40532                  | 38151   | 39044    | 39739     | 227                | 192      | 556       |
| SRR1611179-Bowtie2    | 0.969                                  | 0.981    | 0.988     | 40532                  | 38193   | 39076    | 39783     | 242                | 173      | 606       |
| SRR292250-Bowtie2     | 0.936                                  | 0.949    | 0.944     | 26263                  | 23437   | 23706    | 23898     | 1873               | 783      | 3258      |
| SRR515199-Bowtie2     | 0.994                                  | 0.996    | 0.996     | 32470                  | 32168   | 32242    | 32353     | 135                | 94       | 469       |
| SRR098401-Bowtie2     | 0.957                                  | 0.971    | 0.973     | 25870                  | 24058   | 24454    | 24889     | 1502               | 767      | 3127      |
| SRR1611183-Bowtie2    | 0.975                                  | 0.983    | 0.989     | 40532                  | 38626   | 39206    | 39826     | 165                | 140      | 556       |
| SRR1611184-Bowtie2    | 0.972                                  | 0.981    | 0.986     | 40532                  | 38430   | 39044    | 39642     | 283                | 207      | 764       |
| SRX485062-Bowtie2     | 0.983                                  | 0.991    | 0.997     | 17567                  | 17004   | 17266    | 17473     | 60                 | 82       | 241       |
| ERR194147-Bowtie2     | 0.988                                  | 0.994    | 0.998     | 17567                  | 17195   | 17353    | 17532     | 30                 | 67       | 593       |
| SRX515284-Bowtie2     | 0.983                                  | 0.992    | 0.997     | 17567                  | 17044   | 17301    | 17487     | 35                 | 55       | 187       |
| SRX516752-Bowtie2     | 0.978                                  | 0.987    | 0.995     | 17567                  | 16853   | 17135    | 17411     | 25                 | 46       | 302       |
| SRR1611178-Novobalign | 0.981                                  | 0.986    | 0.987     | 40532                  | 39134   | 39427    | 39581     | 307                | 182      | 240       |
| SRR1611179-Novobalign | 0.981                                  | 0.986    | 0.987     | 40532                  | 39166   | 39458    | 39608     | 315                | 181      | 242       |
| SRR292250-Novobalign  | 0.941                                  | 0.954    | 0.949     | 26263                  | 23774   | 23861    | 23727     | 2239               | 145      | 606       |
| SRR515199-Novobalign  | 0.996                                  | 0.997    | 0.996     | 32470                  | 32313   | 32307    | 32316     | 181                | 68       | 158       |
| SRR098401-Novobalign  | 0.966                                  | 0.978    | 0.975     | 25870                  | 24655   | 24779    | 24717     | 1813               | 242      | 720       |
| SRR1611183-Novobalign | 0.987                                  | 0.989    | 0.989     | 40532                  | 39606   | 39710    | 39743     | 313                | 136      | 224       |
| SRR1611184-Novobalign | 0.984                                  | 0.987    | 0.986     | 40532                  | 39390   | 39536    | 39559     | 376                | 186      | 406       |
| SRX485062-Novobalign  | 0.994                                  | 0.995    | 0.995     | 17567                  | 17408   | 17407    | 17438     | 186                | 160      | 226       |
| ERR194147-Novobalign  | 0.997                                  | 0.999    | 0.997     | 17567                  | 17507   | 17524    | 17517     | 193                | 30       | 190       |
| SRX515284-Novobalign  | 0.990                                  | 0.993    | 0.986     | 17567                  | 17311   | 17344    | 17154     | 381                | 1147     | 210       |
| SRX516752-Novobalign  | 0.989                                  | 0.991    | 0.992     | 17567                  | 17262   | 17263    | 17339     | 113                | 139      | 245       |

| SNP                  | Area under Precision-Recall curve(APR) |          |           |       | True Positive(TP)      |         |          |           |      | False Positive(FP) |          |           |     |
|----------------------|----------------------------------------|----------|-----------|-------|------------------------|---------|----------|-----------|------|--------------------|----------|-----------|-----|
|                      | GATK-HC                                | Samtools | Freebayes | TVC   | # of gold standard SNP | GATK-HC | Samtools | Freebayes | TVC  | GATK-HC            | Samtools | Freebayes | TVC |
| NA12878_combine-tmap | 0.772                                  | 0.858    | 0.819     | 0.777 | 17567                  | 9813    | 12783    | 11861     | 9866 | 220                | 386      | 617       | 104 |

**Supplementary Table 2. Summary table of performance of indel calling from twelve data sets using thirteen pipelines.**

| Indel                 | Area under Precision-Recall curve(APR) |          |           | True Positive(TP)      |         |          |           | False Positive(FP) |          |           |
|-----------------------|----------------------------------------|----------|-----------|------------------------|---------|----------|-----------|--------------------|----------|-----------|
|                       | GATK-HC                                | Samtools | Freebayes | # of gold standard SNP | GATK-HC | Samtools | Freebayes | GATK-HC            | Samtools | Freebayes |
| SRR1611178-BWA-MEM    | 0.826                                  | 0.724    | 0.828     | 3859                   | 2833    | 2376     | 2709      | 369                | 593      | 270       |
| SRR1611179-BWA-MEM    | 0.829                                  | 0.716    | 0.830     | 3859                   | 2857    | 2376     | 2722      | 366                | 645      | 279       |
| SRR292250-BWA-MEM     | 0.775                                  | 0.677    | 0.744     | 1724                   | 1206    | 918      | 1028      | 151                | 182      | 92        |
| SRR515199-BWA-MEM     | 0.852                                  | 0.613    | 0.832     | 2882                   | 2501    | 1560     | 2331      | 320                | 562      | 293       |
| SRR098401-BWA-MEM     | 0.822                                  | 0.661    | 0.815     | 1684                   | 1376    | 1049     | 1268      | 169                | 348      | 110       |
| SRR1611183-BWA-MEM    | 0.838                                  | 0.708    | 0.835     | 3859                   | 2905    | 2312     | 2746      | 447                | 602      | 284       |
| SRR1611184-BWA-MEM    | 0.832                                  | 0.709    | 0.829     | 3859                   | 2860    | 2340     | 2711      | 438                | 606      | 278       |
| SRX485062-BWA-MEM     | 0.831                                  | 0.688    | 0.797     | 419                    | 365     | 316      | 311       | 63                 | 170      | 65        |
| ERR194147-BWA-MEM     | 0.843                                  | 0.713    | 0.791     | 419                    | 373     | 320      | 315       | 63                 | 115      | 62        |
| SRX515284-BWA-MEM     | 0.819                                  | 0.696    | 0.777     | 419                    | 369     | 317      | 307       | 64                 | 170      | 58        |
| SRX516752-BWA-MEM     | 0.827                                  | 0.672    | 0.774     | 419                    | 365     | 316      | 300       | 65                 | 196      | 57        |
| SRR1611178-Bowtie2    | 0.821                                  | 0.721    | 0.828     | 3859                   | 2760    | 2384     | 2707      | 344                | 628      | 284       |
| SRR1611179-Bowtie2    | 0.822                                  | 0.712    | 0.828     | 3859                   | 2773    | 2384     | 2711      | 343                | 669      | 284       |
| SRR292250-Bowtie2     | 0.769                                  | 0.668    | 0.746     | 1724                   | 1174    | 913      | 1042      | 141                | 203      | 103       |
| SRR515199-Bowtie2     | 0.854                                  | 0.590    | 0.833     | 2882                   | 2472    | 1544     | 2321      | 304                | 675      | 302       |
| SRR098401-Bowtie2     | 0.818                                  | 0.646    | 0.820     | 1684                   | 1336    | 1028     | 1287      | 151                | 348      | 122       |
| SRR1611183-Bowtie2    | 0.834                                  | 0.695    | 0.833     | 3859                   | 2843    | 2292     | 2725      | 423                | 629      | 290       |
| SRR1611184-Bowtie2    | 0.827                                  | 0.696    | 0.830     | 3859                   | 2793    | 2326     | 2709      | 410                | 647      | 288       |
| SRX485062-Bowtie2     | 0.829                                  | 0.719    | 0.789     | 419                    | 347     | 310      | 299       | 56                 | 168      | 58        |
| ERR194147-Bowtie2     | 0.840                                  | 0.713    | 0.789     | 419                    | 361     | 311      | 309       | 50                 | 121      | 60        |
| SRX515284-Bowtie2     | 0.800                                  | 0.682    | 0.765     | 419                    | 347     | 311      | 295       | 50                 | 171      | 62        |
| SRX516752-Bowtie2     | 0.794                                  | 0.664    | 0.762     | 419                    | 330     | 301      | 283       | 50                 | 199      | 56        |
| SRR1611178-Novobalign | 0.826                                  | 0.733    | 0.829     | 3859                   | 2833    | 2381     | 2720      | 368                | 560      | 291       |
| SRR1611179-Novobalign | 0.828                                  | 0.724    | 0.830     | 3859                   | 2850    | 2380     | 2723      | 370                | 561      | 283       |
| SRR292250-Novobalign  | 0.776                                  | 0.692    | 0.756     | 1724                   | 1211    | 928      | 1062      | 153                | 150      | 93        |
| SRR515199-Novobalign  | 0.853                                  | 0.615    | 0.834     | 2882                   | 2507    | 1592     | 2357      | 325                | 528      | 308       |
| SRR098401-Novobalign  | 0.825                                  | 0.719    | 0.820     | 1684                   | 1378    | 1064     | 1280      | 167                | 222      | 117       |
| SRR1611183-Novobalign | 0.837                                  | 0.716    | 0.836     | 3859                   | 2902    | 2329     | 2753      | 450                | 555      | 289       |
| SRR1611184-Novobalign | 0.833                                  | 0.709    | 0.832     | 3859                   | 2862    | 2350     | 2729      | 436                | 571      | 296       |
| SRX485062-Novobalign  | 0.832                                  | 0.716    | 0.799     | 419                    | 362     | 313      | 318       | 61                 | 139      | 78        |
| ERR194147-Novobalign  | 0.845                                  | 0.721    | 0.800     | 419                    | 374     | 320      | 325       | 57                 | 125      | 65        |
| SRX515284-Novobalign  | 0.797                                  | 0.716    | 0.756     | 419                    | 350     | 310      | 296       | 80                 | 224      | 57        |
| SRX516752-Novobalign  | 0.815                                  | 0.680    | 0.775     | 419                    | 354     | 302      | 303       | 59                 | 195      | 69        |

| Indel              | Area under Precision-Recall curve(APR) |          |           |       | True Positive(TP)      |         |          |           |     | False Positive(FP) |          |           |     |
|--------------------|----------------------------------------|----------|-----------|-------|------------------------|---------|----------|-----------|-----|--------------------|----------|-----------|-----|
|                    | GATK-HC                                | Samtools | Freebayes | TVC   | # of gold standard SNP | GATK-HC | Samtools | Freebayes | TVC | GATK-HC            | Samtools | Freebayes | TVC |
| ION Torrent Proton | 0.100                                  | 0.161    | 0.048     | 0.051 | 419                    | 106     | 159      | 139       | 57  | 4367               | 66739    | 30122     | 855 |

**Supplementary Table 3.** Summary of concordance among variant callers

| Illumina Platform |                      | 20 QUAL score |                       |                                    |                        |                      |         |          |
|-------------------|----------------------|---------------|-----------------------|------------------------------------|------------------------|----------------------|---------|----------|
|                   |                      | Freebayes     | Freebayes∩<br>GATK-HC | Freebayes∩<br>GATK-HC∩<br>Samtools | Freebayes∩<br>Samtools | GATK-HC∩<br>Samtools | GATK-HC | Samtools |
| wes               | SRR098401_bowtie2    | 7.11%         | 4.43%                 | 82.37%                             | 1.11%                  | 0.62%                | 2.83%   | 1.53%    |
| wes               | SRR098401_bwa-mem    | 3.46%         | 4.19%                 | 85.97%                             | 0.83%                  | 0.45%                | 4.07%   | 1.02%    |
| wes               | SRR098401_novoalign  | 1.41%         | 2.79%                 | 87.43%                             | 0.62%                  | 0.44%                | 6.68%   | 0.65%    |
| wes               | SRR1611178_bowtie2   | 3.41%         | 2.01%                 | 88.55%                             | 1.91%                  | 0.64%                | 2.21%   | 1.27%    |
| wes               | SRR1611178_bwa-mem   | 1.29%         | 2.13%                 | 91.40%                             | 1.07%                  | 0.79%                | 2.22%   | 1.11%    |
| wes               | SRR1611178_novoalign | 1.16%         | 1.98%                 | 91.65%                             | 0.98%                  | 0.82%                | 2.34%   | 1.07%    |
| wes               | SRR1611179_bowtie2   | 3.39%         | 1.99%                 | 88.75%                             | 1.86%                  | 0.55%                | 2.13%   | 1.33%    |
| wes               | SRR1611179_bwa-mem   | 1.33%         | 2.08%                 | 91.28%                             | 1.07%                  | 0.79%                | 2.24%   | 1.21%    |
| wes               | SRR1611179_novoalign | 1.14%         | 2.00%                 | 91.69%                             | 0.94%                  | 0.79%                | 2.29%   | 1.15%    |
| wes               | SRR1611183_bowtie2   | 3.17%         | 2.13%                 | 90.21%                             | 1.21%                  | 0.36%                | 1.61%   | 1.31%    |
| wes               | SRR1611183_bwa-mem   | 0.95%         | 2.28%                 | 92.91%                             | 0.51%                  | 0.41%                | 1.81%   | 1.13%    |
| wes               | SRR1611183_novoalign | 0.75%         | 2.14%                 | 93.20%                             | 0.46%                  | 0.39%                | 1.99%   | 1.07%    |
| wes               | SRR1611184_bowtie2   | 3.35%         | 2.28%                 | 89.73%                             | 1.23%                  | 0.39%                | 1.66%   | 1.36%    |
| wes               | SRR1611184_bwa-mem   | 1.23%         | 2.40%                 | 92.29%                             | 0.60%                  | 0.42%                | 1.88%   | 1.19%    |
| wes               | SRR1611184_novoalign | 1.01%         | 2.15%                 | 92.82%                             | 0.52%                  | 0.37%                | 2.01%   | 1.11%    |
| wes               | SRR292250_bowtie2    | 7.06%         | 4.73%                 | 82.25%                             | 0.97%                  | 0.73%                | 3.27%   | 0.99%    |
| wes               | SRR292250_bwa-mem    | 4.22%         | 4.45%                 | 85.69%                             | 0.62%                  | 0.61%                | 3.88%   | 0.53%    |
| wes               | SRR292250_novoalign  | 1.15%         | 2.32%                 | 86.86%                             | 0.48%                  | 0.57%                | 8.17%   | 0.44%    |
| wes               | SRR515199_bowtie2    | 1.80%         | 3.12%                 | 91.84%                             | 0.40%                  | 0.27%                | 1.02%   | 1.55%    |
| wes               | SRR515199_bwa-mem    | 0.95%         | 3.15%                 | 93.08%                             | 0.21%                  | 0.25%                | 1.16%   | 1.20%    |
| wes               | SRR515199_novoalign  | 0.62%         | 3.06%                 | 93.50%                             | 0.20%                  | 0.19%                | 1.25%   | 1.18%    |
| wgs               | ERR194147_bowtie2    | 3.45%         | 0.26%                 | 94.27%                             | 0.81%                  | 0.15%                | 0.45%   | 0.61%    |
| wgs               | ERR194147_bwa-mem    | 1.40%         | 0.48%                 | 96.35%                             | 0.28%                  | 0.15%                | 0.85%   | 0.50%    |
| wgs               | ERR194147_novoalign  | 0.73%         | 0.50%                 | 96.89%                             | 0.12%                  | 0.13%                | 1.09%   | 0.54%    |
| wgs               | SRX485062_bowtie2    | 2.40%         | 0.33%                 | 93.75%                             | 1.56%                  | 0.24%                | 0.69%   | 1.04%    |
| wgs               | SRX485062_bwa-mem    | 0.69%         | 0.47%                 | 96.61%                             | 0.46%                  | 0.12%                | 0.91%   | 0.73%    |
| wgs               | SRX485062_novoalign  | 0.73%         | 0.57%                 | 96.70%                             | 0.31%                  | 0.16%                | 0.89%   | 0.64%    |
| wgs               | SRX515284_bowtie2    | 2.13%         | 0.31%                 | 94.15%                             | 1.60%                  | 0.26%                | 0.60%   | 0.96%    |
| wgs               | SRX515284_bwa-mem    | 0.74%         | 0.42%                 | 96.70%                             | 0.41%                  | 0.20%                | 0.79%   | 0.74%    |
| wgs               | SRX515284_novoalign  | 0.80%         | 0.36%                 | 92.12%                             | 0.57%                  | 1.51%                | 1.81%   | 2.83%    |
| wgs               | SRX516752_bowtie2    | 2.60%         | 0.45%                 | 93.02%                             | 1.74%                  | 0.41%                | 0.65%   | 1.12%    |
| wgs               | SRX516752_bwa-mem    | 0.80%         | 0.48%                 | 96.60%                             | 0.34%                  | 0.21%                | 0.75%   | 0.82%    |
| wgs               | SRX516752_novoalign  | 0.93%         | 0.59%                 | 95.54%                             | 0.58%                  | 0.31%                | 1.12%   | 0.92%    |

**Supplementary Table 4. Comparison of three benchmarking studies that used GIAB gold standard variants.**

Comparisons of this study, Cornish *et al.*<sup>1</sup>, and Highnam *et al.*<sup>2</sup>.

|                               | This study                                                                                                                        | Cornish <i>et al.</i>                                                                                                               | Highnam <i>et al.</i>                                                                                       |
|-------------------------------|-----------------------------------------------------------------------------------------------------------------------------------|-------------------------------------------------------------------------------------------------------------------------------------|-------------------------------------------------------------------------------------------------------------|
| <b>Benchmark Set</b>          | GIAB high confident integrated pedigree calls v0.2                                                                                | GIAB list                                                                                                                           | GIAB high confident calls v2.18                                                                             |
| <b>Sequencing Platforms</b>   | Illumina HiSeq 2000/2500, Ion Proton                                                                                              | Illumina HiSeq 2000                                                                                                                 | Illumina                                                                                                    |
| <b>Data sets</b>              | 12 data (NA12878, Whole Exome Sequence, Whole Genome Sequence)                                                                    | Single data (NA12878, Whole Exome Sequence)                                                                                         | single data (Simulated data or real data)                                                                   |
| <b>Sequence Read Aligner</b>  | Bowtie2-2.2.25<br>BWA-MEM-0.7.10<br>Novoalign-3.02.12<br>Tmap (for Ion Proton)                                                    | Bowtie2-2.1.0<br>BWA sampe-0.7.5a<br>BWA-MEM-0.7.5a<br>CUSHAW3-3.0.3<br>MOSAIK-2.2.3<br>Novoalign-3.02.07                           | Bowtie2-2.0.0-beta5<br>BWA-0.7.5a<br>BWA-MEM-0.7.5a<br>Novoalign-3.00.04                                    |
| <b>Variant Caller</b>         | Freebayes-0.9.18<br>GATK-HaplotypeCaller-3.3.0<br>Samtools mpileup-1.1<br>TVC-4.2.3 (for Ion Proton)                              | FreeBayes v9.9.2-19-g011561f<br>GATK-HaplotypeCaller-2.7-2<br>GATK-UnifiedGenotyper-2.7-2<br>Samtools mpileup-0.1.19<br>SNPSVM-0.01 | GATK HaplotypeCaller-3.1-1<br>GATK UnifiedGenotyper-3.1-1<br>Samtools mpileup v0.1.18<br>Isaac v01.13.06.20 |
| <b>Benchmark Method</b>       | Area under Precision-Recall curve(APR)                                                                                            | Positive Predictive Value (PPV), Sensitivity separately                                                                             | Positive Predictive Value (PPV)                                                                             |
| <b>Reported Best Pipeline</b> | <b>SNP</b> : BWA-MEM + Samtools mpileup<br><b>Indel</b> : BWA-MEM + GATK-HaplotypeCaller (SNP and Indel were analyzed separately) | Novoalign3 + GATK-UnifiedGenotyper (SNP was analyzed only)                                                                          | Novoalign3 and GATK HaplotypeCaller (SNP and Indel were combined for this analysis)                         |

**Table references**

- 1 Cornish, A. & Guda, C. A comparison of variant calling pipelines using Genome in a Bottle as a reference. *BioMed Research International* (in press).
- 2 Highnam, G. *et al.* An analytical framework for optimizing variant discovery from personal genomes. *Nature Communications* **6** (2015).
